# Supplementary material for: Comparison of Fresh Frozen Tissue With Formalin-Fixed Paraffin-Embedded Tissue for Mutation Analysis Using a Multi-Gene Panel in Patients With Colorectal Cancer
Source: Front Oncol. 2020 Mar 13;10:310. doi: 10.3389/fonc.2020.00310 (PMC7083147; doi:10.3389/fonc.2020.00310)
Supplement: Supplementary file 1 [file Table_1.XLSX]

## Sheet: Sheet1
Variant_Number	Case_ID	Fresh_CHROM	Fresh_POS	Fresh_REF	Fresh_ALT	Fresh_Location	VARIANT_TYPE	Fresh_Var_Length	Fresh_AMPLICON_ID	Fresh_VARIANT_FREQUENCY	Fresh_VARIANT_QUALITY	Fresh_VARIANT_READ_DIRECTION_RATIO	Fresh_VCR_VARIANT_COVERAGE	Fresh_TOTAL_COVERAGE	Fresh_CONSEQUENCE	Fresh_IMPACT	Fresh_SYMBOL	Fresh_GENE	Fresh_FEATURE	Fresh_HGVSC	Fresh_DNA_Change	Fresh_HGVSP	Fresh_EXON	Fresh_INTRON	Fresh_CDS_POSITION	Fresh_PROTEIN_POSITION	Fresh_AMINO_ACIDS	Fresh_CODONS	Fresh_REPEAT	Fresh_HGVS_OFFSET	Fresh_SIFT	Fresh_POLYPHEN	Fresh_CLIN_SIG	FFPE_CHROM	FFPE_POS	FFPE_REF	FFPE_ALT	FFPE_Location	VARIANT_CLASS	FFPE_Var_Length	FFPE_AMPLICON_ID	FFPE_VARIANT_FREQUENCY	FFPE_VARIANT_QUALITY	FFPE_VARIANT_READ_DIRECTION_RATIO	FFPE_VCR_VARIANT_COVERAGE	FFPE_TOTAL_COVERAGE	FFPE_CONSEQUENCE	FFPE_IMPACT	FFPE_SYMBOL
1	1507016	17	7577120	C	T	chr17:7577120-7577120	SNV	1	081-TP53-79	8.67	34	-0.01	210	2422	missense_variant	MODERATE	TP53	7157	NM_000546	NM_000546.5:c.818G>A	c.818G>A	NP_000537.3:p.Arg273His	8/11		818	273	R/H	cGt/cAt			tolerated(0.13)	possibly_damaging(0.631)	likely_pathogenic&pathogenic
2	1507016	4	153247366	C	T	chr4:153247366-153247366	SNV	1	038-FBXW7-36	29.97	34	-0.01	3030	10109	missense_variant	MODERATE	FBXW7	55294	NM_033632	NM_033632.3:c.1436G>A	c.1436G>A	NP_361014.1:p.Arg479Gln	10/12		1436	479	R/Q	cGa/cAa			deleterious(0.03)	probably_damaging(1)		4	153247366	C	T	chr4:153247366-153247366	SNV	1	038-FBXW7-36	17.58	38	0	1017	5785	missense_variant	MODERATE	FBXW7
3	1507016	10	89711899	C	T	chr10:89711899-89711899	SNV	1	066-PTEN-64	32.36	35	0	827	2556	missense_variant	MODERATE	PTEN	5728	NM_000314	NM_000314.4:c.517C>T	c.517C>T	NP_000305.3:p.Arg173Cys	6/9		517	173	R/C	Cgc/Tgc			deleterious(0.02)	probably_damaging(0.913)	likely_pathogenic&pathogenic	10	89711899	C	T	chr10:89711899-89711899	SNV	1	066-PTEN-64	18.1	38	0	785	4338	missense_variant	MODERATE	PTEN
4	1507016	10	89717709	A	C	chr10:89717709-89717709	SNV	1	068-PTEN-66	29.28	33	0	570	1947	missense_variant	MODERATE	PTEN	5728	NM_000314	NM_000314.4:c.734A>C	c.734A>C	NP_000305.3:p.Gln245Pro	7/9		734	245	Q/P	cAg/cCg			tolerated(0.14)	benign(0.012)
5	1507016	10	89717769	TA	T	chr10:89717770-89717770	Deletion	1	068-PTEN-66	33.81	33	-0.02	659	1949	frameshift_variant	HIGH	PTEN	5728	NM_000314	NM_000314.4:c.800delA	c.800delA	NP_000305.3:p.Lys267ArgfsTer9	7/9		795	265	L/X	ctA/ct	6A	5				10	89717769	NA	N	chr10:89717770-89717770	Deletion	1	068-PTEN-66	20.67	37	0.01	769	3720	frameshift_variant	HIGH	PTEN
6	1507145	12	25398284	C	A	chr12:25398284-25398284	SNV	1	077-KRAS-75	43.9	33	0	1836	4182	missense_variant	MODERATE	KRAS	3845	NM_004985	NM_004985.3:c.35G>T	c.35G>T	NP_004976.2:p.Gly12Val	2/5		35	12	G/V	gGt/gTt			deleterious(0)	probably_damaging(0.958)	pathogenic	12	25398284	C	A	chr12:25398284-25398284	SNV	1	077-KRAS-75	61.4	37	0	1279	2083	missense_variant	MODERATE	KRAS
7	1507145	17	7577123	A	C	chr17:7577123-7577123	SNV	1	081-TP53-79	47.21	34	-0.01	1479	3133	missense_variant	MODERATE	TP53	7157	NM_000546	NM_000546.5:c.815T>G	c.815T>G	NP_000537.3:p.Val272Gly	8/11		815	272	V/G	gTg/gGg			deleterious(0)	probably_damaging(1)	uncertain_significance	17	7577123	A	C	chr17:7577123-7577123	SNV	1	081-TP53-79	64.03	37	0	1481	2313	missense_variant	MODERATE	TP53
8	1507169	17	7578212	G	A	chr17:7578212-7578212	SNV	1	083-TP53-81	57.88	35	0	1127	1947	stop_gained	HIGH	TP53	7157	NM_000546	NM_000546.5:c.637C>T	c.637C>T	NP_000537.3:p.Arg213Ter	6/11		637	213	R/*	Cga/Tga	4A-1				pathogenic	17	7578212	G	A	chr17:7578212-7578212	SNV	1	083-TP53-81	25	37	0	636	2544	stop_gained	HIGH	TP53
9	1507169	12	25398285	C	G	chr12:25398285-25398285	SNV	1	077-KRAS-75	38.44	33	0	2711	7053	missense_variant	MODERATE	KRAS	3845	NM_004985	NM_004985.3:c.34G>C	c.34G>C	NP_004976.2:p.Gly12Arg	2/5		34	12	G/R	Ggt/Cgt			deleterious(0.03)	benign(0.291)	not_provided&pathogenic	12	25398285	C	G	chr12:25398285-25398285	SNV	1	077-KRAS-75	17.97	37	-0.02	696	3874	missense_variant	MODERATE	KRAS
10	1507169																																	18	48591919	G	A	chr18:48591919-48591919	SNV	1	096-SMAD4-94	22.31	37	0	714	3200	missense_variant	MODERATE	SMAD4
11	1507777	12	25398281	C	T	chr12:25398281-25398281	SNV	1	077-KRAS-75	76.36	35	0	4617	6046	missense_variant	MODERATE	KRAS	3845	NM_004985	NM_004985.3:c.38G>A	c.38G>A	NP_004976.2:p.Gly13Asp	2/5		38	13	G/D	gGc/gAc			deleterious(0.04)	benign(0.266)	pathogenic	12	25398281	C	T	chr12:25398281-25398281	SNV	1	077-KRAS-75	38.52	38	0	988	2565	missense_variant	MODERATE	KRAS
12	1507777	17	7574003	G	A	chr17:7574003-7574003	SNV	1	080-TP53-78	76.95	34	0	7694	9999	stop_gained	HIGH	TP53	7157	NM_000546	NM_000546.5:c.1024C>T	c.1024C>T	NP_000537.3:p.Arg342Ter	10/11		1024	342	R/*	Cga/Tga					pathogenic	17	7574003	G	A	chr17:7574003-7574003	SNV	1	080-TP53-78	46.05	38	0	1640	3561	stop_gained	HIGH	TP53
13	1507925	12	25398284	C	T	chr12:25398284-25398284	SNV	1	077-KRAS-75	9.54	38	0	723	7577	missense_variant	MODERATE	KRAS	3845	NM_004985	NM_004985.3:c.35G>A	c.35G>A	NP_004976.2:p.Gly12Asp	2/5		35	12	G/D	gGt/gAt			deleterious(0)	benign(0.202)	pathogenic	12	25398284	C	T	chr12:25398284-25398284	SNV	1	077-KRAS-75	19.5	38	-0.01	233	1195	missense_variant	MODERATE	KRAS
14	1507925	12	25398285	C	T	chr12:25398285-25398285	SNV	1	077-KRAS-75	24.57	39	0	1862	7577	missense_variant	MODERATE	KRAS	3845	NM_004985	NM_004985.3:c.34G>A	c.34G>A	NP_004976.2:p.Gly12Ser	2/5		34	12	G/S	Ggt/Agt			deleterious(0.03)	possibly_damaging(0.447)	not_provided&pathogenic
15	1507925	3	178927457	G	T	chr3:178927457-178927457	SNV	1	025-PIK3CA	25.22	39	0	576	2284	missense_variant	MODERATE	PIK3CA	5290	NM_006218	NM_006218.2:c.1220G>T	c.1220G>T	NP_006209.2:p.Cys407Phe	7/21		1220	407	C/F	tGc/tTc			tolerated(0.15)	probably_damaging(0.998)
16	1508127																																	12	25398284	C	G	chr12:25398284-25398284	SNV	1	077-KRAS-75	66.63	37	0	2043	3066	missense_variant	MODERATE	KRAS
17	1508127																																	17	7578393	A	C	chr17:7578393-7578393	SNV	1	084-TP53-82	58.58	37	0	1741	2972	missense_variant	MODERATE	TP53
18	1508357																																	17	7578406	C	T	chr17:7578406-7578406	SNV	1	084-TP53-82	32.65	37	0	719	2202	missense_variant	MODERATE	TP53
19	1508571	17	7577580	T	C	chr17:7577580-7577580	SNV	1	082-TP53-80	33.2	34	0	2447	7371	missense_variant	MODERATE	TP53	7157	NM_000546	NM_000546.5:c.701A>G	c.701A>G	NP_000537.3:p.Tyr234Cys	7/11		701	234	Y/C	tAc/tGc			deleterious(0)	probably_damaging(0.992)	likely_pathogenic&pathogenic	17	7577580	T	C	chr17:7577580-7577580	SNV	1	082-TP53-80	29.51	37	0	442	1498	missense_variant	MODERATE	TP53
20	1508803																																	17	7578265	A	G	chr17:7578265-7578265	SNV	1	083-TP53-81	18.91	38	0	305	1613	missense_variant	MODERATE	TP53
21	1509025	12	25398284	C	T	chr12:25398284-25398284	SNV	1	077-KRAS-75	25.38	38	0	730	2876	missense_variant	MODERATE	KRAS	3845	NM_004985	NM_004985.3:c.35G>A	c.35G>A	NP_004976.2:p.Gly12Asp	2/5		35	12	G/D	gGt/gAt			deleterious(0)	benign(0.202)	pathogenic	12	25398284	C	T	chr12:25398284-25398284	SNV	1	077-KRAS-75	22.68	37	0	890	3925	missense_variant	MODERATE	KRAS
22	1509025																																	3	178952084	C	T	chr3:178952084-178952084	SNV	1	030-PIK3CA_sg24	27.92	37	-0.01	786	2815	missense_variant	MODERATE	PIK3CA
23	1509025																																	17	7578245	G	A	chr17:7578245-7578245	SNV	1	083-TP53-81	24.69	37	0	413	1673	missense_variant	MODERATE	TP53
24	1509254	12	25398284	C	T	chr12:25398284-25398284	SNV	1	077-KRAS-75	29.84	35	-0.01	1817	6090	missense_variant	MODERATE	KRAS	3845	NM_004985	NM_004985.3:c.35G>A	c.35G>A	NP_004976.2:p.Gly12Asp	2/5		35	12	G/D	gGt/gAt			deleterious(0)	benign(0.202)	pathogenic	12	25398284	C	T	chr12:25398284-25398284	SNV	1	077-KRAS-75	46.2	37	0	1555	3366	missense_variant	MODERATE	KRAS
25	1509254	3	178936091	G	A	chr3:178936091-178936091	SNV	1	027-PIK3CA	12.38	35	0	621	5016	missense_variant	MODERATE	PIK3CA	5290	NM_006218	NM_006218.2:c.1633G>A	c.1633G>A	NP_006209.2:p.Glu545Lys	10/21		1633	545	E/K	Gag/Aag			deleterious(0.02)	probably_damaging(0.959)	not_provided&pathogenic	3	178936091	G	A	chr3:178936091-178936091	SNV	1	027-PIK3CA	22.75	37	0	989	4348	missense_variant	MODERATE	PIK3CA
26	1509449	12	25398284	C	T	chr12:25398284-25398284	SNV	1	077-KRAS-75	18.25	38	0	849	4652	missense_variant	MODERATE	KRAS	3845	NM_004985	NM_004985.3:c.35G>A	c.35G>A	NP_004976.2:p.Gly12Asp	2/5		35	12	G/D	gGt/gAt			deleterious(0)	benign(0.202)	pathogenic	12	25398284	C	T	chr12:25398284-25398284	SNV	1	077-KRAS-75	18.23	38	0	581	3187	missense_variant	MODERATE	KRAS
27	1509449	3	178936091	G	A	chr3:178936091-178936091	SNV	1	027-PIK3CA	15.58	39	0	445	2856	missense_variant	MODERATE	PIK3CA	5290	NM_006218	NM_006218.2:c.1633G>A	c.1633G>A	NP_006209.2:p.Glu545Lys	10/21		1633	545	E/K	Gag/Aag			deleterious(0.02)	probably_damaging(0.959)	not_provided&pathogenic
28	1509449	18	48591919	G	A	chr18:48591919-48591919	SNV	1	096-SMAD4-94	20.22	38	0	1008	4985	missense_variant	MODERATE	SMAD4	4089	NM_005359	NM_005359.5:c.1082G>A	c.1082G>A	NP_005350.1:p.Arg361His	9/12		1082	361	R/H	cGc/cAc			deleterious(0.03)	probably_damaging(1)	pathogenic
29	1509449	18	48575192	A	G	chr18:48575192-48575192	SNV	1	091-SMAD4-89	22.88	39	0	716	3130	missense_variant	MODERATE	SMAD4	4089	NM_005359	NM_005359.5:c.386A>G	c.386A>G	NP_005350.1:p.Asn129Ser	3/12		386	129	N/S	aAt/aGt			deleterious(0)	probably_damaging(0.999)		18	48575192	A	G	chr18:48575192-48575192	SNV	1	091-SMAD4-89	35.68	38	0	1544	4327	missense_variant	MODERATE	SMAD4
30	1509449																																	3	178916891	G	T	chr3:178916891-178916891	SNV	1	023-PIK3CA	11.64	38	0	313	2688	missense_variant	MODERATE	PIK3CA
31	1509449																																	3	178952085	A	T	chr3:178952085-178952085	SNV	1	030-PIK3CA_sg24	17.16	38	-0.01	822	4789	missense_variant	MODERATE	PIK3CA
32	1509742																																	17	7578406	C	T	chr17:7578406-7578406	SNV	1	084-TP53-82	40.3	37	0	1249	3099	missense_variant	MODERATE	TP53
33	1510921	4	153249384	C	T	chr4:153249384-153249384	SNV	1	039-FBXW7-37	24.42	34	-0.01	1600	6551	missense_variant	MODERATE	FBXW7	55294	NM_033632	NM_033632.3:c.1394G>A	c.1394G>A	NP_361014.1:p.Arg465His	9/12		1394	465	R/H	cGt/cAt			deleterious(0)	probably_damaging(0.998)		4	153249384	C	T	chr4:153249384-153249384	SNV	1	039-FBXW7-37	21.62	37	0	398	1841	missense_variant	MODERATE	FBXW7
34	1510921																																	17	7578406	C	T	chr17:7578406-7578406	SNV	1	084-TP53-82	32.52	37	0	544	1673	missense_variant	MODERATE	TP53
35	1511147	12	25398284	C	T	chr12:25398284-25398284	SNV	1	077-KRAS-75	26.24	35	-0.01	1226	4672	missense_variant	MODERATE	KRAS	3845	NM_004985	NM_004985.3:c.35G>A	c.35G>A	NP_004976.2:p.Gly12Asp	2/5		35	12	G/D	gGt/gAt			deleterious(0)	benign(0.202)	pathogenic	12	25398284	C	T	chr12:25398284-25398284	SNV	1	077-KRAS-75	25.68	37	0	784	3053	missense_variant	MODERATE	KRAS
36	1511147	17	7577509	C	T	chr17:7577509-7577509	SNV	1	082-TP53-80	41	34	0	1599	3900	missense_variant	MODERATE	TP53	7157	NM_000546	NM_000546.5:c.772G>A	c.772G>A	NP_000537.3:p.Glu258Lys	7/11		772	258	E/K	Gaa/Aaa			deleterious(0)	probably_damaging(0.995)	pathogenic	17	7577509	C	T	chr17:7577509-7577509	SNV	1	082-TP53-80	35.55	37	0	450	1266	missense_variant	MODERATE	TP53
37	1511372	12	25398281	C	T	chr12:25398281-25398281	SNV	1	077-KRAS-75	10.96	39	0	583	5319	missense_variant	MODERATE	KRAS	3845	NM_004985	NM_004985.3:c.38G>A	c.38G>A	NP_004976.2:p.Gly13Asp	2/5		38	13	G/D	gGc/gAc			deleterious(0.04)	benign(0.266)	pathogenic	12	25398281	C	T	chr12:25398281-25398281	SNV	1	077-KRAS-75	10.77	37	0	252	2339	missense_variant	MODERATE	KRAS
38	1511372	12	25398285	C	T	chr12:25398285-25398285	SNV	1	077-KRAS-75	13.09	39	0	696	5319	missense_variant	MODERATE	KRAS	3845	NM_004985	NM_004985.3:c.34G>A	c.34G>A	NP_004976.2:p.Gly12Ser	2/5		34	12	G/S	Ggt/Agt			deleterious(0.03)	possibly_damaging(0.447)	not_provided&pathogenic
39	1511372																																	17	7578404	A	G	chr17:7578404-7578404	SNV	1	084-TP53-82	13.87	37	0.02	476	3432	missense_variant	MODERATE	TP53
40	1512483	17	7577609	C	A	chr17:7577609-7577609	SNV	1	082-TP53-80	41.21	35	0	1523	3696	splice_acceptor_variant	HIGH	TP53	7157	NM_000546	NM_000546.5:c.673-1G>T	c.673-1G>T			6/10									pathogenic	17	7577609	C	A	chr17:7577609-7577609	SNV	1	082-TP53-80	46.02	37	-0.01	526	1143	splice_acceptor_variant	HIGH	TP53
41	1512699	17	7577538	C	T	chr17:7577538-7577538	SNV	1	082-TP53-80	54.7	35	0	3191	5834	missense_variant	MODERATE	TP53	7157	NM_000546	NM_000546.5:c.743G>A	c.743G>A	NP_000537.3:p.Arg248Gln	7/11		743	248	R/Q	cGg/cAg			deleterious(0)	probably_damaging(1)	uncertain_significance&likely_pathogenic&pathogenic	17	7577538	C	T	chr17:7577538-7577538	SNV	1	082-TP53-80	31.28	37	-0.01	860	2749	missense_variant	MODERATE	TP53
42	1513416	17	7578550	GAGTACTGT	G	chr17:7578551-7578558	Deletion	8	085-TP53-83	15.9	33	0	541	3404	splice_acceptor_variant&coding_sequence_variant&intron_variant	HIGH	TP53	7157	NM_000546	NM_000546.5:c.376-4_379delACAGTACT	c.376-4_379delAC		5/11	4/10	?-379	?-127			_4G+1
43	1513416																																	12	25398285	C	A	chr12:25398285-25398285	SNV	1	077-KRAS-75	13.68	38	0	836	6111	missense_variant	MODERATE	KRAS
44	1513416																																	17	7578395	G	A	chr17:7578395-7578395	SNV	1	084-TP53-82	40.57	38	0	637	1570	missense_variant	MODERATE	TP53
45	1514116	17	7578212	G	A	chr17:7578212-7578212	SNV	1	083-TP53-81	74.63	35	0	1303	1746	stop_gained	HIGH	TP53	7157	NM_000546	NM_000546.5:c.637C>T	c.637C>T	NP_000537.3:p.Arg213Ter	6/11		637	213	R/*	Cga/Tga	4A-1				pathogenic	17	7578212	G	A	chr17:7578212-7578212	SNV	1	083-TP53-81	31.99	37	0.01	628	1963	stop_gained	HIGH	TP53
46	1514116	12	25398285	C	A	chr12:25398285-25398285	SNV	1	077-KRAS-75	53.08	34	0	3219	6065	missense_variant	MODERATE	KRAS	3845	NM_004985	NM_004985.3:c.34G>T	c.34G>T	NP_004976.2:p.Gly12Cys	2/5		34	12	G/C	Ggt/Tgt			deleterious(0.02)	probably_damaging(0.975)	not_provided&pathogenic	12	25398285	C	A	chr12:25398285-25398285	SNV	1	077-KRAS-75	23.39	38	0	1295	5536	missense_variant	MODERATE	KRAS
47	1514116	15	66727429	C	T	chr15:66727429-66727429	SNV	1	079-MAP2K1-77	81.82	33	0	9414	11506	missense_variant	MODERATE	MAP2K1	5604	NM_002755	NM_002755.3:c.145C>T	c.145C>T	NP_002746.1:p.Arg49Cys	2/11		145	49	R/C	Cgc/Tgc			deleterious(0)	probably_damaging(0.973)		15	66727429	C	T	chr15:66727429-66727429	SNV	1	079-MAP2K1-77	33.84	37	0	1038	3067	missense_variant	MODERATE	MAP2K1
48	1514842	4	153247366	C	T	chr4:153247366-153247366	SNV	1	038-FBXW7-36	41.3	39	0	2441	5911	missense_variant	MODERATE	FBXW7	55294	NM_033632	NM_033632.3:c.1436G>A	c.1436G>A	NP_361014.1:p.Arg479Gln	10/12		1436	479	R/Q	cGa/cAa			deleterious(0.03)	probably_damaging(1)
49	1514842	7	140453136	A	T	chr7:140453136-140453136	SNV	1	056-BRAF-54	16.94	39	0	385	2273	missense_variant	MODERATE	BRAF	673	NM_004333	NM_004333.4:c.1799T>A	c.1799T>A	NP_004324.2:p.Val600Glu	15/18		1799	600	V/E	gTg/gAg			deleterious(0)	probably_damaging(0.967)	pathogenic	7	140453136	A	T	chr7:140453136-140453136	SNV	1	056-BRAF-54	9.8	37	-0.01	428	4367	missense_variant	MODERATE	BRAF
50	1514842	14	105246551	C	T	chr14:105246551-105246551	SNV	1	078-AKT1-76	16.86	39	0	1093	6482	missense_variant&splice_region_variant	MODERATE	AKT1	207	NM_005163	NM_005163.2:c.49G>A	c.49G>A	NP_005154.2:p.Glu17Lys	3/14		49	17	E/K	Gag/Aag	4C		deleterious(0)	probably_damaging(0.999)	pathogenic	14	105246551	C	T	chr14:105246551-105246551	SNV	1	078-AKT1-76	10.05	37	0	408	4059	missense_variant&splice_region_variant	MODERATE	AKT1
51	1514842																																	17	7577538	C	A	chr17:7577538-7577538	SNV	1	082-TP53-80	11.14	37	-0.01	262	2351	missense_variant	MODERATE	TP53
52	1514879	12	25398284	C	T	chr12:25398284-25398284	SNV	1	077-KRAS-75	24.45	38	0	1792	7328	missense_variant	MODERATE	KRAS	3845	NM_004985	NM_004985.3:c.35G>A	c.35G>A	NP_004976.2:p.Gly12Asp	2/5		35	12	G/D	gGt/gAt			deleterious(0)	benign(0.202)	pathogenic
53	1515093	17	7577120	C	T	chr17:7577120-7577120	SNV	1	081-TP53-79	37.54	34	0	771	2054	missense_variant	MODERATE	TP53	7157	NM_000546	NM_000546.5:c.818G>A	c.818G>A	NP_000537.3:p.Arg273His	8/11		818	273	R/H	cGt/cAt			tolerated(0.13)	possibly_damaging(0.631)	likely_pathogenic&pathogenic	17	7577120	C	T	chr17:7577120-7577120	SNV	1	081-TP53-79	53.74	37	0	933	1736	missense_variant	MODERATE	TP53
54	1515327	12	25398284	C	T	chr12:25398284-25398284	SNV	1	077-KRAS-75	26.18	35	0	2072	7913	missense_variant	MODERATE	KRAS	3845	NM_004985	NM_004985.3:c.35G>A	c.35G>A	NP_004976.2:p.Gly12Asp	2/5		35	12	G/D	gGt/gAt			deleterious(0)	benign(0.202)	pathogenic	12	25398284	C	T	chr12:25398284-25398284	SNV	1	077-KRAS-75	64.62	38	0	1914	2962	missense_variant	MODERATE	KRAS
55	1515327																																	17	7578406	C	T	chr17:7578406-7578406	SNV	1	084-TP53-82	58.64	38	0	1602	2732	missense_variant	MODERATE	TP53
56	1515790	17	7577548	C	T	chr17:7577548-7577548	SNV	1	082-TP53-80	29.31	35	0	1065	3634	missense_variant	MODERATE	TP53	7157	NM_000546	NM_000546.5:c.733G>A	c.733G>A	NP_000537.3:p.Gly245Ser	7/11		733	245	G/S	Ggc/Agc			deleterious(0)	probably_damaging(1)	likely_pathogenic&pathogenic	17	7577548	C	T	chr17:7577548-7577548	SNV	1	082-TP53-80	33.67	38	0	609	1809	missense_variant	MODERATE	TP53
57	1516311	17	7577121	G	A	chr17:7577121-7577121	SNV	1	081-TP53-79	18.65	38	0	310	1662	missense_variant	MODERATE	TP53	7157	NM_000546	NM_000546.5:c.817C>T	c.817C>T	NP_000537.3:p.Arg273Cys	8/11		817	273	R/C	Cgt/Tgt			deleterious(0)	probably_damaging(0.998)	uncertain_significance&pathogenic
58	1516311	4	153247289	G	A	chr4:153247289-153247289	SNV	1	038-FBXW7-36	13.75	39	0	852	6197	missense_variant	MODERATE	FBXW7	55294	NM_033632	NM_033632.3:c.1513C>T	c.1513C>T	NP_361014.1:p.Arg505Cys	10/12		1513	505	R/C	Cgc/Tgc			deleterious(0)	probably_damaging(1)		4	153247289	G	A	chr4:153247289-153247289	SNV	1	038-FBXW7-36	17.04	39	0	263	1543	missense_variant	MODERATE	FBXW7
59	1516311	7	140453136	A	T	chr7:140453136-140453136	SNV	1	056-BRAF-54	9.78	39	0	385	3935	missense_variant	MODERATE	BRAF	673	NM_004333	NM_004333.4:c.1799T>A	c.1799T>A	NP_004324.2:p.Val600Glu	15/18		1799	600	V/E	gTg/gAg			deleterious(0)	probably_damaging(0.967)	pathogenic
60	1516311	12	25380283	C	T	chr12:25380283-25380283	SNV	1	076-KRAS-74	16.1	38	0	798	4957	missense_variant	MODERATE	KRAS	3845	NM_004985	NM_004985.3:c.175G>A	c.175G>A	NP_004976.2:p.Ala59Thr	3/5		175	59	A/T	Gca/Aca			deleterious(0.05)	benign(0.227)	likely_pathogenic&pathogenic
61	1516311	14	105246551	C	T	chr14:105246551-105246551	SNV	1	078-AKT1-76	12.14	39	0	1094	9015	missense_variant&splice_region_variant	MODERATE	AKT1	207	NM_005163	NM_005163.2:c.49G>A	c.49G>A	NP_005154.2:p.Glu17Lys	3/14		49	17	E/K	Gag/Aag	4C		deleterious(0)	probably_damaging(0.999)	pathogenic
62	1517732	17	7578527	A	G	chr17:7578527-7578527	SNV	1	085-TP53-83	48.2	34	0.01	1058	2195	missense_variant	MODERATE	TP53	7157	NM_000546	NM_000546.5:c.403T>C	c.403T>C	NP_000537.3:p.Cys135Arg	5/11		403	135	C/R	Tgc/Cgc	4A		deleterious(0)	probably_damaging(1)		17	7578527	A	G	chr17:7578527-7578527	SNV	1	085-TP53-83	58.89	38	0	765	1299	missense_variant	MODERATE	TP53
63	1518186	12	25398285	C	T	chr12:25398285-25398285	SNV	1	077-KRAS-75	29.52	39	0	1862	6307	missense_variant	MODERATE	KRAS	3845	NM_004985	NM_004985.3:c.34G>A	c.34G>A	NP_004976.2:p.Gly12Ser	2/5		34	12	G/S	Ggt/Agt			deleterious(0.03)	possibly_damaging(0.447)	not_provided&pathogenic	12	25398285	C	T	chr12:25398285-25398285	SNV	1	077-KRAS-75	13.23	37	0	411	3106	missense_variant	MODERATE	KRAS
64	1518186	3	178927457	G	T	chr3:178927457-178927457	SNV	1	025-PIK3CA	30.16	39	0	576	1910	missense_variant	MODERATE	PIK3CA	5290	NM_006218	NM_006218.2:c.1220G>T	c.1220G>T	NP_006209.2:p.Cys407Phe	7/21		1220	407	C/F	tGc/tTc			tolerated(0.15)	probably_damaging(0.998)		3	178927457	G	T	chr3:178927457-178927457	SNV	1	025-PIK3CA	11.34	37	0	345	3042	missense_variant	MODERATE	PIK3CA
65	1519746	3	178947852	C	A	chr3:178947852-178947852	SNV	1	029-PIK3CA	22.67	34	0	2373	10469	missense_variant	MODERATE	PIK3CA	5290	NM_006218	NM_006218.2:c.2727C>A	c.2727C>A	NP_006209.2:p.Phe909Leu	19/21		2727	909	F/L	ttC/ttA			tolerated(0.11)	benign(0.303)		3	178947852	C	A	chr3:178947852-178947852	SNV	1	029-PIK3CA	24.61	39	0	239	971	missense_variant	MODERATE	PIK3CA
66	1519746	17	7578555	C	A	chr17:7578555-7578555	SNV	1	085-TP53-83	43.71	34	0.01	1182	2704	splice_acceptor_variant	HIGH	TP53	7157	NM_000546	NM_000546.5:c.376-1G>T	c.376-1G>T			4/10										17	7578555	C	A	chr17:7578555-7578555	SNV	1	085-TP53-83	49.77	39	-0.02	430	864	splice_acceptor_variant	HIGH	TP53
67	1520935	3	178936082	G	A	chr3:178936082-178936082	SNV	1	027-PIK3CA	18.04	39	0	548	3038	missense_variant	MODERATE	PIK3CA	5290	NM_006218	NM_006218.2:c.1624G>A	c.1624G>A	NP_006209.2:p.Glu542Lys	10/21		1624	542	E/K	Gaa/Aaa	4CT+1		deleterious(0.04)	probably_damaging(0.96)	pathogenic
68	1520935	4	153247366	C	T	chr4:153247366-153247366	SNV	1	038-FBXW7-36	42.08	39	0	2447	5815	missense_variant	MODERATE	FBXW7	55294	NM_033632	NM_033632.3:c.1436G>A	c.1436G>A	NP_361014.1:p.Arg479Gln	10/12		1436	479	R/Q	cGa/cAa			deleterious(0.03)	probably_damaging(1)		4	153247366	C	T	chr4:153247366-153247366	SNV	1	038-FBXW7-36	59.26	37	0	3078	5194	missense_variant	MODERATE	FBXW7
69	1520935	10	89692898	A	G	chr10:89692898-89692898	SNV	1	064-PTEN-62	16.38	38	0.01	332	2027	missense_variant	MODERATE	PTEN	5728	NM_000314	NM_000314.4:c.382A>G	c.382A>G	NP_000305.3:p.Lys128Glu	5/9		382	128	K/E	Aag/Gag			deleterious(0)	probably_damaging(0.999)
70	1520935	2	212812165	C	A	chr2:212812165-212812165	SNV	1	021-ERBB4	14.39	39	0	640	4449	missense_variant	MODERATE	ERBB4	2066	NM_005235	NM_005235.2:c.411G>T	c.411G>T	NP_005226.1:p.Lys137Asn	3/28		411	137	K/N	aaG/aaT			tolerated(0.18)	benign(0.009)
71	1520935	10	89624258	G	T	chr10:89624258-89624258	SNV	1	062-PTEN-60	13.72	39	0	407	2967	missense_variant	MODERATE	PTEN	5728	NM_000314	NM_000314.4:c.32G>T	c.32G>T	NP_000305.3:p.Arg11Ile	1/9		32	11	R/I	aGa/aTa			deleterious(0)	benign(0.058)
72	1520935	15	66727423	C	T	chr15:66727423-66727423	SNV	1	079-MAP2K1-77	19.92	39	0	1272	6386	stop_gained	HIGH	MAP2K1	5604	NM_002755	NM_002755.3:c.139C>T	c.139C>T	NP_002746.1:p.Arg47Ter	2/11		139	47	R/*	Cga/Tga
73	1521177	12	25398281	C	T	chr12:25398281-25398281	SNV	1	077-KRAS-75	5.09	38	0	229	4500	missense_variant	MODERATE	KRAS	3845	NM_004985	NM_004985.3:c.38G>A	c.38G>A	NP_004976.2:p.Gly13Asp	2/5		38	13	G/D	gGc/gAc			deleterious(0.04)	benign(0.266)	pathogenic
74	1521177	12	25380279	C	T	chr12:25380279-25380279	SNV	1	076-KRAS-74	12.96	39	0	498	3844	missense_variant	MODERATE	KRAS	3845	NM_004985	NM_004985.3:c.179G>A	c.179G>A	NP_004976.2:p.Gly60Asp	3/5		179	60	G/D	gGt/gAt			deleterious(0)	probably_damaging(1)		12	25380279	C	T	chr12:25380279-25380279	SNV	1	076-KRAS-74	34.01	37	0	622	1829	missense_variant	MODERATE	KRAS
75	1521177	17	7577535	C	A	chr17:7577535-7577535	SNV	1	082-TP53-80	16.86	38	0	214	1269	missense_variant	MODERATE	TP53	7157	NM_000546	NM_000546.5:c.746G>T	c.746G>T	NP_000537.3:p.Arg249Met	7/11		746	249	R/M	aGg/aTg			deleterious(0)	probably_damaging(0.993)		17	7577535	C	A	chr17:7577535-7577535	SNV	1	082-TP53-80	50.07	37	0	730	1458	missense_variant	MODERATE	TP53
76	1521201	17	7577539	G	A	chr17:7577539-7577539	SNV	1	082-TP53-80	31.56	35	0	767	2430	missense_variant	MODERATE	TP53	7157	NM_000546	NM_000546.5:c.742C>T	c.742C>T	NP_000537.3:p.Arg248Trp	7/11		742	248	R/W	Cgg/Tgg			deleterious(0)	probably_damaging(1)	pathogenic	17	7577539	G	A	chr17:7577539-7577539	SNV	1	082-TP53-80	73.69	38	0	423	574	missense_variant	MODERATE	TP53
77	1522188	3	178916930	G	A	chr3:178916930-178916930	SNV	1	023-PIK3CA	17.76	38	0	304	1712	missense_variant	MODERATE	PIK3CA	5290	NM_006218	NM_006218.2:c.317G>A	c.317G>A	NP_006209.2:p.Gly106Asp	2/21		317	106	G/D	gGc/gAc			deleterious(0.01)	probably_damaging(1)		3	178916930	G	A	chr3:178916930-178916930	SNV	1	023-PIK3CA	12.98	37	-0.01	551	4246	missense_variant	MODERATE	PIK3CA
78	1522188	3	178952146	G	GA	chr3:178952146-178952147	Insertion	1	031-PIK3CA_sg25	14.34	39	-0.09	372	2595	frameshift_variant	HIGH	PIK3CA	5290	NM_006218	NM_006218.2:c.3203dupA	c.3203dupA	NP_006209.2:p.Asn1068LysfsTer5	21/21		3201-3202	1067-1068	-/X	-/A		2				3	178952145	N	NA	chr3:178952145-178952146	Insertion	1	031-PIK3CA_sg25	13.49	37	-0.01	1230	9115	frameshift_variant	HIGH	PIK3CA
79	1522414	12	25398281	C	T	chr12:25398281-25398281	SNV	1	077-KRAS-75	62.65	35	0	5083	8113	missense_variant	MODERATE	KRAS	3845	NM_004985	NM_004985.3:c.38G>A	c.38G>A	NP_004976.2:p.Gly13Asp	2/5		38	13	G/D	gGc/gAc			deleterious(0.04)	benign(0.266)	pathogenic	12	25398281	C	T	chr12:25398281-25398281	SNV	1	077-KRAS-75	54.02	37	0	3423	6337	missense_variant	MODERATE	KRAS
80	1522414	4	153249388	C	T	chr4:153249388-153249388	SNV	1	039-FBXW7-37	42.34	35	-0.01	2934	6929	missense_variant	MODERATE	FBXW7	55294	NM_033632	NM_033632.3:c.1390G>A	c.1390G>A	NP_361014.1:p.Val464Met	9/12		1390	464	V/M	Gtg/Atg			deleterious(0)	probably_damaging(0.997)		4	153249388	C	T	chr4:153249388-153249388	SNV	1	039-FBXW7-37	36.88	37	-0.01	1268	3438	missense_variant	MODERATE	FBXW7
81	1522414																																	17	7578437	G	A	chr17:7578437-7578437	SNV	1	084-TP53-82	50.94	37	0	2191	4301	stop_gained	HIGH	TP53
82	1522456	12	25398281	C	T	chr12:25398281-25398281	SNV	1	077-KRAS-75	29.58	35	0	2415	8163	missense_variant	MODERATE	KRAS	3845	NM_004985	NM_004985.3:c.38G>A	c.38G>A	NP_004976.2:p.Gly13Asp	2/5		38	13	G/D	gGc/gAc			deleterious(0.04)	benign(0.266)	pathogenic	12	25398281	C	T	chr12:25398281-25398281	SNV	1	077-KRAS-75	23.45	37	0	820	3497	missense_variant	MODERATE	KRAS
83	1522456	4	153249384	C	T	chr4:153249384-153249384	SNV	1	039-FBXW7-37	36.01	35	-0.01	2002	5559	missense_variant	MODERATE	FBXW7	55294	NM_033632	NM_033632.3:c.1394G>A	c.1394G>A	NP_361014.1:p.Arg465His	9/12		1394	465	R/H	cGt/cAt			deleterious(0)	probably_damaging(0.998)		4	153249384	C	T	chr4:153249384-153249384	SNV	1	039-FBXW7-37	22.51	37	0	598	2657	missense_variant	MODERATE	FBXW7
84	1522456	17	7578265	A	G	chr17:7578265-7578265	SNV	1	083-TP53-81	41.14	34	-0.01	929	2258	missense_variant	MODERATE	TP53	7157	NM_000546	NM_000546.5:c.584T>C	c.584T>C	NP_000537.3:p.Ile195Thr	6/11		584	195	I/T	aTc/aCc			deleterious(0)	probably_damaging(1)	pathogenic	17	7578265	A	G	chr17:7578265-7578265	SNV	1	083-TP53-81	30.22	37	0	1211	4007	missense_variant	MODERATE	TP53
85	1523093	4	153258983	G	A	chr4:153258983-153258983	SNV	1	041-FBXW7-39	35.91	35	0	3600	10024	stop_gained	HIGH	FBXW7	55294	NM_033632	NM_033632.3:c.832C>T	c.832C>T	NP_361014.1:p.Arg278Ter	5/12		832	278	R/*	Cga/Tga
86	1523093	17	7577580	T	C	chr17:7577580-7577580	SNV	1	082-TP53-80	59.87	34	0	1110	1854	missense_variant	MODERATE	TP53	7157	NM_000546	NM_000546.5:c.701A>G	c.701A>G	NP_000537.3:p.Tyr234Cys	7/11		701	234	Y/C	tAc/tGc			deleterious(0)	probably_damaging(0.992)	likely_pathogenic&pathogenic	17	7577580	T	C	chr17:7577580-7577580	SNV	1	082-TP53-80	13.67	37	0	234	1712	missense_variant	MODERATE	TP53
87	1524530	4	153249384	C	A	chr4:153249384-153249384	SNV	1	039-FBXW7-37	32.83	35	0	2189	6668	missense_variant	MODERATE	FBXW7	55294	NM_033632	NM_033632.3:c.1394G>T	c.1394G>T	NP_361014.1:p.Arg465Leu	9/12		1394	465	R/L	cGt/cTt			deleterious(0)	probably_damaging(0.966)		4	153249384	C	A	chr4:153249384-153249384	SNV	1	039-FBXW7-37	21.65	37	0	250	1155	missense_variant	MODERATE	FBXW7
88	1524530																																	17	7578406	C	T	chr17:7578406-7578406	SNV	1	084-TP53-82	36.17	37	0.01	756	2090	missense_variant	MODERATE	TP53
89	1524762	17	7577094	G	A	chr17:7577094-7577094	SNV	1	081-TP53-79	13.47	34	-0.01	568	4218	missense_variant	MODERATE	TP53	7157	NM_000546	NM_000546.5:c.844C>T	c.844C>T	NP_000537.3:p.Arg282Trp	8/11		844	282	R/W	Cgg/Tgg			deleterious(0)	probably_damaging(0.997)	pathogenic	17	7577094	G	A	chr17:7577094-7577094	SNV	1	081-TP53-79	39.24	37	-0.01	726	1850	missense_variant	MODERATE	TP53
90	1524762	4	153258983	G	A	chr4:153258983-153258983	SNV	1	041-FBXW7-39	5.97	35	0	642	10749	stop_gained	HIGH	FBXW7	55294	NM_033632	NM_033632.3:c.832C>T	c.832C>T	NP_361014.1:p.Arg278Ter	5/12		832	278	R/*	Cga/Tga						4	153258983	G	A	chr4:153258983-153258983	SNV	1	041-FBXW7-39	21.11	37	0	391	1852	stop_gained	HIGH	FBXW7
91	1527390	17	7577538	C	T	chr17:7577538-7577538	SNV	1	082-TP53-80	21.8	35	-0.01	652	2991	missense_variant	MODERATE	TP53	7157	NM_000546	NM_000546.5:c.743G>A	c.743G>A	NP_000537.3:p.Arg248Gln	7/11		743	248	R/Q	cGg/cAg			deleterious(0)	probably_damaging(1)	uncertain_significance&likely_pathogenic&pathogenic	17	7577538	C	T	chr17:7577538-7577538	SNV	1	082-TP53-80	35.75	37	0	469	1312	missense_variant	MODERATE	TP53
92	1528042	12	25398284	C	T	chr12:25398284-25398284	SNV	1	077-KRAS-75	29.16	38	0	1044	3580	missense_variant	MODERATE	KRAS	3845	NM_004985	NM_004985.3:c.35G>A	c.35G>A	NP_004976.2:p.Gly12Asp	2/5		35	12	G/D	gGt/gAt			deleterious(0)	benign(0.202)	pathogenic	12	25398284	C	T	chr12:25398284-25398284	SNV	1	077-KRAS-75	21.42	38	0	682	3184	missense_variant	MODERATE	KRAS
93	1528042	4	153249384	C	T	chr4:153249384-153249384	SNV	1	039-FBXW7-37	26.71	39	0	536	2007	missense_variant	MODERATE	FBXW7	55294	NM_033632	NM_033632.3:c.1394G>A	c.1394G>A	NP_361014.1:p.Arg465His	9/12		1394	465	R/H	cGt/cAt			deleterious(0)	probably_damaging(0.998)		4	153249384	C	T	chr4:153249384-153249384	SNV	1	039-FBXW7-37	14.66	38	0	272	1856	missense_variant	MODERATE	FBXW7
94	1528042	17	7577124	C	A	chr17:7577124-7577124	SNV	1	081-TP53-79	34.52	38	0	261	756	missense_variant	MODERATE	TP53	7157	NM_000546	NM_000546.5:c.814G>T	c.814G>T	NP_000537.3:p.Val272Leu	8/11		814	272	V/L	Gtg/Ttg			deleterious(0)	probably_damaging(0.923)	uncertain_significance&pathogenic	17	7577124	C	A	chr17:7577124-7577124	SNV	1	081-TP53-79	22.51	38	-0.01	400	1777	missense_variant	MODERATE	TP53
95	1528042																																	3	178952006	T	C	chr3:178952006-178952006	SNV	1	030-PIK3CA_sg24	6.56	38	-0.03	287	4375	missense_variant	MODERATE	PIK3CA
96	1528900	12	25398284	C	A	chr12:25398284-25398284	SNV	1	077-KRAS-75	53.64	34	0	6934	12926	missense_variant	MODERATE	KRAS	3845	NM_004985	NM_004985.3:c.35G>T	c.35G>T	NP_004976.2:p.Gly12Val	2/5		35	12	G/V	gGt/gTt			deleterious(0)	probably_damaging(0.958)	pathogenic	12	25398284	C	A	chr12:25398284-25398284	SNV	1	077-KRAS-75	53.22	38	0	2362	4438	missense_variant	MODERATE	KRAS
97	1528900	17	7578212	G	A	chr17:7578212-7578212	SNV	1	083-TP53-81	59.82	34	0	1285	2148	stop_gained	HIGH	TP53	7157	NM_000546	NM_000546.5:c.637C>T	c.637C>T	NP_000537.3:p.Arg213Ter	6/11		637	213	R/*	Cga/Tga	4A-1				pathogenic	17	7578212	G	A	chr17:7578212-7578212	SNV	1	083-TP53-81	56.36	38	0	1081	1918	stop_gained	HIGH	TP53
98	1530872	3	178936091	G	A	chr3:178936091-178936091	SNV	1	027-PIK3CA	11.06	35	0	1492	13493	missense_variant	MODERATE	PIK3CA	5290	NM_006218	NM_006218.2:c.1633G>A	c.1633G>A	NP_006209.2:p.Glu545Lys	10/21		1633	545	E/K	Gag/Aag			deleterious(0.02)	probably_damaging(0.959)	not_provided&pathogenic	3	178936091	G	A	chr3:178936091-178936091	SNV	1	027-PIK3CA	17.12	37	0	314	1834	missense_variant	MODERATE	PIK3CA
99	1530872	12	25398285	C	A	chr12:25398285-25398285	SNV	1	077-KRAS-75	21.32	34	0	2188	10265	missense_variant	MODERATE	KRAS	3845	NM_004985	NM_004985.3:c.34G>T	c.34G>T	NP_004976.2:p.Gly12Cys	2/5		34	12	G/C	Ggt/Tgt			deleterious(0.02)	probably_damaging(0.975)	not_provided&pathogenic	12	25398285	C	A	chr12:25398285-25398285	SNV	1	077-KRAS-75	34.74	37	0	585	1684	missense_variant	MODERATE	KRAS
100	1531062	17	7577568	C	T	chr17:7577568-7577568	SNV	1	082-TP53-80	52.18	35	0	1459	2796	missense_variant	MODERATE	TP53	7157	NM_000546	NM_000546.5:c.713G>A	c.713G>A	NP_000537.3:p.Cys238Tyr	7/11		713	238	C/Y	tGt/tAt			deleterious(0)	probably_damaging(1)	uncertain_significance&likely_pathogenic	17	7577568	C	T	chr17:7577568-7577568	SNV	1	082-TP53-80	42.6	37	0	792	1859	missense_variant	MODERATE	TP53
101	1531528	12	25398284	C	T	chr12:25398284-25398284	SNV	1	077-KRAS-75	15.54	38	0	848	5457	missense_variant	MODERATE	KRAS	3845	NM_004985	NM_004985.3:c.35G>A	c.35G>A	NP_004976.2:p.Gly12Asp	2/5		35	12	G/D	gGt/gAt			deleterious(0)	benign(0.202)	pathogenic
102	1531528	12	25398281	C	T	chr12:25398281-25398281	SNV	1	077-KRAS-75	13.52	39	0	738	5457	missense_variant	MODERATE	KRAS	3845	NM_004985	NM_004985.3:c.38G>A	c.38G>A	NP_004976.2:p.Gly13Asp	2/5		38	13	G/D	gGc/gAc			deleterious(0.04)	benign(0.266)	pathogenic
103	1531528	3	178936091	G	A	chr3:178936091-178936091	SNV	1	027-PIK3CA	12.25	39	0	443	3616	missense_variant	MODERATE	PIK3CA	5290	NM_006218	NM_006218.2:c.1633G>A	c.1633G>A	NP_006209.2:p.Glu545Lys	10/21		1633	545	E/K	Gag/Aag			deleterious(0.02)	probably_damaging(0.959)	not_provided&pathogenic
104	1531528	18	48591919	G	A	chr18:48591919-48591919	SNV	1	096-SMAD4-94	21.4	38	0	1006	4701	missense_variant	MODERATE	SMAD4	4089	NM_005359	NM_005359.5:c.1082G>A	c.1082G>A	NP_005350.1:p.Arg361His	9/12		1082	361	R/H	cGc/cAc			deleterious(0.03)	probably_damaging(1)	pathogenic
105	1531528	18	48575192	A	G	chr18:48575192-48575192	SNV	1	091-SMAD4-89	26.02	39	0	713	2740	missense_variant	MODERATE	SMAD4	4089	NM_005359	NM_005359.5:c.386A>G	c.386A>G	NP_005350.1:p.Asn129Ser	3/12		386	129	N/S	aAt/aGt			deleterious(0)	probably_damaging(0.999)
106	1534191	12	25398285	C	G	chr12:25398285-25398285	SNV	1	077-KRAS-75	10.66	33	0	829	7774	missense_variant	MODERATE	KRAS	3845	NM_004985	NM_004985.3:c.34G>C	c.34G>C	NP_004976.2:p.Gly12Arg	2/5		34	12	G/R	Ggt/Cgt			deleterious(0.03)	benign(0.291)	not_provided&pathogenic	12	25398285	C	G	chr12:25398285-25398285	SNV	1	077-KRAS-75	38.35	37	0	1326	3458	missense_variant	MODERATE	KRAS
107	1534191																																	3	178936091	G	A	chr3:178936091-178936091	SNV	1	027-PIK3CA	25.58	37	0	1317	5148	missense_variant	MODERATE	PIK3CA
108	1534781	12	25398284	C	G	chr12:25398284-25398284	SNV	1	077-KRAS-75	36.52	34	0	3024	8280	missense_variant	MODERATE	KRAS	3845	NM_004985	NM_004985.3:c.35G>C	c.35G>C	NP_004976.2:p.Gly12Ala	2/5		35	12	G/A	gGt/gCt			deleterious(0.02)	possibly_damaging(0.502)	pathogenic
109	1534781	17	7578190	T	C	chr17:7578190-7578190	SNV	1	083-TP53-81	61.42	33	0	1027	1672	missense_variant	MODERATE	TP53	7157	NM_000546	NM_000546.5:c.659A>G	c.659A>G	NP_000537.3:p.Tyr220Cys	6/11		659	220	Y/C	tAt/tGt			deleterious(0)	probably_damaging(1)	likely_pathogenic&pathogenic
110	1534781	18	48575159	C	T	chr18:48575159-48575159	SNV	1	091-SMAD4-89	14.43	35	0	333	2307	missense_variant	MODERATE	SMAD4	4089	NM_005359	NM_005359.5:c.353C>T	c.353C>T	NP_005350.1:p.Ala118Val	3/12		353	118	A/V	gCg/gTg			deleterious(0.04)	probably_damaging(0.971)
111	1534781																																	17	7577120	C	T	chr17:7577120-7577120	SNV	1	081-TP53-79	37.26	37	0	654	1755	missense_variant	MODERATE	TP53
112	1536583	12	25398284	C	A	chr12:25398284-25398284	SNV	1	077-KRAS-75	26	34	0	1829	7035	missense_variant	MODERATE	KRAS	3845	NM_004985	NM_004985.3:c.35G>T	c.35G>T	NP_004976.2:p.Gly12Val	2/5		35	12	G/V	gGt/gTt			deleterious(0)	probably_damaging(0.958)	pathogenic	12	25398284	C	A	chr12:25398284-25398284	SNV	1	077-KRAS-75	13.66	37	0	477	3492	missense_variant	MODERATE	KRAS
113	1538406	12	25398285	C	A	chr12:25398285-25398285	SNV	1	077-KRAS-75	21.34	37	0	894	4190	missense_variant	MODERATE	KRAS	3845	NM_004985	NM_004985.3:c.34G>T	c.34G>T	NP_004976.2:p.Gly12Cys	2/5		34	12	G/C	Ggt/Tgt			deleterious(0.02)	probably_damaging(0.975)	not_provided&pathogenic	12	25398285	C	A	chr12:25398285-25398285	SNV	1	077-KRAS-75	45.67	38	0	1512	3311	missense_variant	MODERATE	KRAS
114	1538406	17	7578454	G	A	chr17:7578454-7578454	SNV	1	084-TP53-82	28.02	36	-0.03	274	978	missense_variant	MODERATE	TP53	7157	NM_000546	NM_000546.5:c.476C>T	c.476C>T	NP_000537.3:p.Ala159Val	5/11		476	159	A/V	gCc/gTc			deleterious(0)	possibly_damaging(0.9)		17	7578454	G	A	chr17:7578454-7578454	SNV	1	084-TP53-82	73.8	37	0	986	1336	missense_variant	MODERATE	TP53
115	1541324	12	25398284	C	T	chr12:25398284-25398284	SNV	1	077-KRAS-75	36.42	37	0	1800	4942	missense_variant	MODERATE	KRAS	3845	NM_004985	NM_004985.3:c.35G>A	c.35G>A	NP_004976.2:p.Gly12Asp	2/5		35	12	G/D	gGt/gAt			deleterious(0)	benign(0.202)	pathogenic	12	25398284	C	T	chr12:25398284-25398284	SNV	1	077-KRAS-75	13.18	37	0	469	3558	missense_variant	MODERATE	KRAS
116	1541324	17	7578268	A	C	chr17:7578268-7578268	SNV	1	083-TP53-81	48.26	36	0	777	1610	missense_variant	MODERATE	TP53	7157	NM_000546	NM_000546.5:c.581T>G	c.581T>G	NP_000537.3:p.Leu194Arg	6/11		581	194	L/R	cTt/cGt			deleterious(0)	probably_damaging(1)		17	7578268	A	C	chr17:7578268-7578268	SNV	1	083-TP53-81	17.86	37	0	415	2323	missense_variant	MODERATE	TP53
117	1543710	12	25398284	C	T	chr12:25398284-25398284	SNV	1	077-KRAS-75	34.05	37	0	1397	4103	missense_variant	MODERATE	KRAS	3845	NM_004985	NM_004985.3:c.35G>A	c.35G>A	NP_004976.2:p.Gly12Asp	2/5		35	12	G/D	gGt/gAt			deleterious(0)	benign(0.202)	pathogenic	12	25398284	C	T	chr12:25398284-25398284	SNV	1	077-KRAS-75	27.35	38	0	317	1159	missense_variant	MODERATE	KRAS
118	1543710	17	7577094	G	A	chr17:7577094-7577094	SNV	1	081-TP53-79	73.22	36	0	793	1083	missense_variant	MODERATE	TP53	7157	NM_000546	NM_000546.5:c.844C>T	c.844C>T	NP_000537.3:p.Arg282Trp	8/11		844	282	R/W	Cgg/Tgg			deleterious(0)	probably_damaging(0.997)	pathogenic	17	7577094	G	A	chr17:7577094-7577094	SNV	1	081-TP53-79	42.15	38	0	325	771	missense_variant	MODERATE	TP53
119	1543710	4	153245446	G	A	chr4:153245446-153245446	SNV	1	037-FBXW7-35	43.1	37	0	612	1420	missense_variant	MODERATE	FBXW7	55294	NM_033632	NM_033632.3:c.1745C>T	c.1745C>T	NP_361014.1:p.Ser582Leu	11/12		1745	582	S/L	tCg/tTg			tolerated(0.15)	probably_damaging(0.996)
120	1544210	3	178916876	G	A	chr3:178916876-178916876	SNV	1	023-PIK3CA	10.59	39	0	325	3068	missense_variant	MODERATE	PIK3CA	5290	NM_006218	NM_006218.2:c.263G>A	c.263G>A	NP_006209.2:p.Arg88Gln	2/21		263	88	R/Q	cGa/cAa			tolerated(0.06)	probably_damaging(0.998)
121	1544210	12	25378562	C	T	chr12:25378562-25378562	SNV	1	075-KRAS-73	21.13	39	0	1380	6532	missense_variant	MODERATE	KRAS	3845	NM_004985	NM_004985.3:c.436G>A	c.436G>A	NP_004976.2:p.Ala146Thr	4/5		436	146	A/T	Gca/Aca			deleterious(0.03)	possibly_damaging(0.843)	uncertain_significance	12	25378562	C	T	chr12:25378562-25378562	SNV	1	075-KRAS-73	24.6	38	0	923	3752	missense_variant	MODERATE	KRAS
122	1544210	2	212812236	G	A	chr2:212812236-212812236	SNV	1	021-ERBB4	13.3	39	0	821	6174	stop_gained	HIGH	ERBB4	2066	NM_005235	NM_005235.2:c.340C>T	c.340C>T	NP_005226.1:p.Arg114Ter	3/28		340	114	R/*	Cga/Tga
123	1544210	10	89624245	G	T	chr10:89624245-89624245	SNV	1	062-PTEN-60	16.93	39	0	709	4187	stop_gained	HIGH	PTEN	5728	NM_000314	NM_000314.4:c.19G>T	c.19G>T	NP_000305.3:p.Glu7Ter	1/9		19	7	E/*	Gag/Tag
124	1544210	10	123279621	C	T	chr10:123279621-123279621	SNV	1	074-FGFR2-72	17.19	39	-0.03	473	2751	missense_variant	MODERATE	FGFR2	2263	NM_000141	NM_000141.4:c.811G>A	c.811G>A	NP_000132.3:p.Gly271Arg	7/18		811	271	G/R	Gga/Aga			deleterious(0)	probably_damaging(0.909)
125	1544210																																	3	178936091	G	A	chr3:178936091-178936091	SNV	1	027-PIK3CA	11.25	38	0	410	3645	missense_variant	MODERATE	PIK3CA
126	1544210																																	17	7578460	A	T	chr17:7578460-7578460	SNV	1	084-TP53-82	14.21	38	-0.01	383	2695	missense_variant	MODERATE	TP53
127	1544467	1	162745555	T	C	chr1:162745555-162745555	SNV	1	009-DDR2	19.95	37	0	864	4331	missense_variant	MODERATE	DDR2	4921	NM_006182	NM_006182.2:c.1970T>C	c.1970T>C	NP_006173.2:p.Met657Thr	15/18		1970	657	M/T	aTg/aCg			deleterious(0)	probably_damaging(0.988)
128	1544467	17	37880220	T	C	chr17:37880220-37880220	SNV	1	088-ERBB2-86	30.59	37	0	936	3060	missense_variant	MODERATE	ERBB2	2064	NM_004448	NM_004448.2:c.2264T>C	c.2264T>C	NP_004439.2:p.Leu755Ser	19/27		2264	755	L/S	tTg/tCg			deleterious(0)	probably_damaging(1)		17	37880220	T	C	chr17:37880220-37880220	SNV	1	088-ERBB2-86	31.13	38	0	1116	3585	missense_variant	MODERATE	ERBB2
129	1544469	12	25398284	C	T	chr12:25398284-25398284	SNV	1	077-KRAS-75	16.77	37	-0.01	838	4997	missense_variant	MODERATE	KRAS	3845	NM_004985	NM_004985.3:c.35G>A	c.35G>A	NP_004976.2:p.Gly12Asp	2/5		35	12	G/D	gGt/gAt			deleterious(0)	benign(0.202)	pathogenic	12	25398284	C	T	chr12:25398284-25398284	SNV	1	077-KRAS-75	26.71	37	0	1239	4639	missense_variant	MODERATE	KRAS
130	1545632	12	25398284	C	T	chr12:25398284-25398284	SNV	1	077-KRAS-75	28.11	37	0	1166	4148	missense_variant	MODERATE	KRAS	3845	NM_004985	NM_004985.3:c.35G>A	c.35G>A	NP_004976.2:p.Gly12Asp	2/5		35	12	G/D	gGt/gAt			deleterious(0)	benign(0.202)	pathogenic	12	25398284	C	T	chr12:25398284-25398284	SNV	1	077-KRAS-75	20.99	37	0	565	2692	missense_variant	MODERATE	KRAS
131	1545632	3	178936094	C	G	chr3:178936094-178936094	SNV	1	027-PIK3CA	27.81	36	0	1354	4868	missense_variant	MODERATE	PIK3CA	5290	NM_006218	NM_006218.2:c.1636C>G	c.1636C>G	NP_006209.2:p.Gln546Glu	10/21		1636	546	Q/E	Cag/Gag			tolerated(0.13)	possibly_damaging(0.705)	likely_pathogenic&pathogenic	3	178936094	C	G	chr3:178936094-178936094	SNV	1	027-PIK3CA	21.47	37	0	726	3382	missense_variant	MODERATE	PIK3CA
132	1545632	17	7578412	A	C	chr17:7578412-7578412	SNV	1	084-TP53-82	39.63	37	-0.02	390	984	missense_variant	MODERATE	TP53	7157	NM_000546	NM_000546.5:c.518T>G	c.518T>G	NP_000537.3:p.Val173Gly	5/11		518	173	V/G	gTg/gGg			deleterious(0)	probably_damaging(1)		17	7578412	A	C	chr17:7578412-7578412	SNV	1	084-TP53-82	30.94	37	0	565	1826	missense_variant	MODERATE	TP53
133	1546644	4	153245417	T	C	chr4:153245417-153245417	SNV	1	037-FBXW7-35	53.84	37	0	617	1146	missense_variant	MODERATE	FBXW7	55294	NM_033632	NM_033632.3:c.1774A>G	c.1774A>G	NP_361014.1:p.Asn592Asp	11/12		1774	592	N/D	Aat/Gat			tolerated(0.16)	probably_damaging(0.99)		4	153245417	T	C	chr4:153245417-153245417	SNV	1	037-FBXW7-35	72.64	38	0	1383	1904	missense_variant	MODERATE	FBXW7
134	1546644																																	12	25398285	C	A	chr12:25398285-25398285	SNV	1	077-KRAS-75	39.89	38	0	2697	6761	missense_variant	MODERATE	KRAS
135	1546644																																	17	7577111	NCA	N	chr17:7577112-7577113	Deletion	2	081-TP53-79	41.52	37	0	1292	3112	frameshift_variant	HIGH	TP53
136	1547592	17	7578190	T	C	chr17:7578190-7578190	SNV	1	083-TP53-81	67.99	37	0	616	906	missense_variant	MODERATE	TP53	7157	NM_000546	NM_000546.5:c.659A>G	c.659A>G	NP_000537.3:p.Tyr220Cys	6/11		659	220	Y/C	tAt/tGt			deleterious(0)	probably_damaging(1)	likely_pathogenic&pathogenic	17	7578190	T	C	chr17:7578190-7578190	SNV	1	083-TP53-81	43.92	39	0	473	1077	missense_variant	MODERATE	TP53
137	1548329																																	12	25398284	C	T	chr12:25398284-25398284	SNV	1	077-KRAS-75	13.5	38	0	228	1689	missense_variant	MODERATE	KRAS
138	1548329																																	17	7578437	G	A	chr17:7578437-7578437	SNV	1	084-TP53-82	23.1	39	0	280	1212	stop_gained	HIGH	TP53
139	1550196	3	178916930	G	A	chr3:178916930-178916930	SNV	1	023-PIK3CA	15.17	38	0	305	2011	missense_variant	MODERATE	PIK3CA	5290	NM_006218	NM_006218.2:c.317G>A	c.317G>A	NP_006209.2:p.Gly106Asp	2/21		317	106	G/D	gGc/gAc			deleterious(0.01)	probably_damaging(1)
140	1550196	3	178952146	G	GA	chr3:178952146-178952147	Insertion	1	031-PIK3CA_sg25	13.39	39	-0.07	372	2778	frameshift_variant	HIGH	PIK3CA	5290	NM_006218	NM_006218.2:c.3203dupA	c.3203dupA	NP_006209.2:p.Asn1068LysfsTer5	21/21		3201-3202	1067-1068	-/X	-/A		2
141	1550196																																	12	25398284	C	A	chr12:25398284-25398284	SNV	1	077-KRAS-75	41.19	37	0	2229	5411	missense_variant	MODERATE	KRAS
142	1550196																																	17	7578479	G	A	chr17:7578479-7578479	SNV	1	084-TP53-82	65.26	37	0	1768	2709	missense_variant	MODERATE	TP53
143	1600209	4	153247289	G	A	chr4:153247289-153247289	SNV	1	038-FBXW7-36	32.58	37	0	1725	5294	missense_variant	MODERATE	FBXW7	55294	NM_033632	NM_033632.3:c.1513C>T	c.1513C>T	NP_361014.1:p.Arg505Cys	10/12		1513	505	R/C	Cgc/Tgc			deleterious(0)	probably_damaging(1)		4	153247289	G	A	chr4:153247289-153247289	SNV	1	038-FBXW7-36	40.83	37	0	2098	5139	missense_variant	MODERATE	FBXW7
144	1600209	12	25398284	C	G	chr12:25398284-25398284	SNV	1	077-KRAS-75	16.64	36	0	813	4887	missense_variant	MODERATE	KRAS	3845	NM_004985	NM_004985.3:c.35G>C	c.35G>C	NP_004976.2:p.Gly12Ala	2/5		35	12	G/A	gGt/gCt			deleterious(0.02)	possibly_damaging(0.502)	pathogenic	12	25398284	C	G	chr12:25398284-25398284	SNV	1	077-KRAS-75	21.14	37	-0.01	452	2138	missense_variant	MODERATE	KRAS
145	1600209	17	7578203	C	T	chr17:7578203-7578203	SNV	1	083-TP53-81	42.05	37	0	606	1441	missense_variant	MODERATE	TP53	7157	NM_000546	NM_000546.5:c.646G>A	c.646G>A	NP_000537.3:p.Val216Met	6/11		646	216	V/M	Gtg/Atg			deleterious(0)	probably_damaging(1)	uncertain_significance&likely_pathogenic	17	7578203	C	T	chr17:7578203-7578203	SNV	1	083-TP53-81	53.07	37	0	1219	2297	missense_variant	MODERATE	TP53
146	1600504	12	25378648	T	C	chr12:25378648-25378648	SNV	1	075-KRAS-73	40.97	37	0	2299	5612	missense_variant	MODERATE	KRAS	3845	NM_004985	NM_004985.3:c.350A>G	c.350A>G	NP_004976.2:p.Lys117Arg	4/5		350	117	K/R	aAa/aGa			deleterious(0)	possibly_damaging(0.658)		12	25378648	T	C	chr12:25378648-25378648	SNV	1	075-KRAS-73	28.73	37	0	1535	5342	missense_variant	MODERATE	KRAS
147	1601609																																	17	7577539	G	A	chr17:7577539-7577539	SNV	1	082-TP53-80	60.61	39	0	240	396	missense_variant	MODERATE	TP53
148	1601861	12	25398281	C	T	chr12:25398281-25398281	SNV	1	077-KRAS-75	9.61	39	0	564	5868	missense_variant	MODERATE	KRAS	3845	NM_004985	NM_004985.3:c.38G>A	c.38G>A	NP_004976.2:p.Gly13Asp	2/5		38	13	G/D	gGc/gAc			deleterious(0.04)	benign(0.266)	pathogenic
149	1601861	12	25398285	C	T	chr12:25398285-25398285	SNV	1	077-KRAS-75	11.86	39	0	696	5866	missense_variant	MODERATE	KRAS	3845	NM_004985	NM_004985.3:c.34G>A	c.34G>A	NP_004976.2:p.Gly12Ser	2/5		34	12	G/S	Ggt/Agt			deleterious(0.03)	possibly_damaging(0.447)	not_provided&pathogenic
150	1601861																																	12	25380275	T	G	chr12:25380275-25380275	SNV	1	076-KRAS-74	21.8	37	0	797	3656	missense_variant	MODERATE	KRAS
151	1601861																																	17	7577105	G	A	chr17:7577105-7577105	SNV	1	081-TP53-79	28.58	37	0	751	2628	missense_variant	MODERATE	TP53
152	1601889	17	7578263	G	A	chr17:7578263-7578263	SNV	1	083-TP53-81	66.2	36	0	997	1506	stop_gained	HIGH	TP53	7157	NM_000546	NM_000546.5:c.586C>T	c.586C>T	NP_000537.3:p.Arg196Ter	6/11		586	196	R/*	Cga/Tga					uncertain_significance&pathogenic	17	7578263	G	A	chr17:7578263-7578263	SNV	1	083-TP53-81	40.99	37	0	1274	3108	stop_gained	HIGH	TP53
153	1602078	17	7577538	C	T	chr17:7577538-7577538	SNV	1	082-TP53-80	78.39	37	0	1727	2203	missense_variant	MODERATE	TP53	7157	NM_000546	NM_000546.5:c.743G>A	c.743G>A	NP_000537.3:p.Arg248Gln	7/11		743	248	R/Q	cGg/cAg			deleterious(0)	probably_damaging(1)	uncertain_significance&likely_pathogenic&pathogenic	17	7577538	C	T	chr17:7577538-7577538	SNV	1	082-TP53-80	18.07	37	0	360	1992	missense_variant	MODERATE	TP53
154	1602078	4	153247366	C	T	chr4:153247366-153247366	SNV	1	038-FBXW7-36	25.05	37	0	1193	4763	missense_variant	MODERATE	FBXW7	55294	NM_033632	NM_033632.3:c.1436G>A	c.1436G>A	NP_361014.1:p.Arg479Gln	10/12		1436	479	R/Q	cGa/cAa			deleterious(0.03)	probably_damaging(1)		4	153247366	C	T	chr4:153247366-153247366	SNV	1	038-FBXW7-36	8.45	37	-0.01	457	5411	missense_variant	MODERATE	FBXW7
155	1602509	17	7578212	G	A	chr17:7578212-7578212	SNV	1	083-TP53-81	40.16	36	0.01	541	1347	stop_gained	HIGH	TP53	7157	NM_000546	NM_000546.5:c.637C>T	c.637C>T	NP_000537.3:p.Arg213Ter	6/11		637	213	R/*	Cga/Tga	4A-1				pathogenic	17	7578212	G	A	chr17:7578212-7578212	SNV	1	083-TP53-81	21.2	37	0	695	3278	stop_gained	HIGH	TP53
156	1602509	15	66727429	C	T	chr15:66727429-66727429	SNV	1	079-MAP2K1-77	28.02	37	0	1742	6216	missense_variant	MODERATE	MAP2K1	5604	NM_002755	NM_002755.3:c.145C>T	c.145C>T	NP_002746.1:p.Arg49Cys	2/11		145	49	R/C	Cgc/Tgc			deleterious(0)	probably_damaging(0.973)		15	66727429	C	T	chr15:66727429-66727429	SNV	1	079-MAP2K1-77	16.05	37	0	827	5153	missense_variant	MODERATE	MAP2K1
157	1602512	17	7578268	A	C	chr17:7578268-7578268	SNV	1	083-TP53-81	51.04	37	0	638	1250	missense_variant	MODERATE	TP53	7157	NM_000546	NM_000546.5:c.581T>G	c.581T>G	NP_000537.3:p.Leu194Arg	6/11		581	194	L/R	cTt/cGt			deleterious(0)	probably_damaging(1)		17	7578268	A	C	chr17:7578268-7578268	SNV	1	083-TP53-81	48.4	37	0.01	860	1777	missense_variant	MODERATE	TP53
158	1602740																																	1	115256529	T	C	chr1:115256529-115256529	SNV	1	002-NRAS	24.46	37	-0.01	909	3716	missense_variant	MODERATE	NRAS
159	1602740																																	3	178952085	A	G	chr3:178952085-178952085	SNV	1	030-PIK3CA_sg24	22.68	37	-0.01	1466	6463	missense_variant	MODERATE	PIK3CA
160	1602761	12	25398284	C	T	chr12:25398284-25398284	SNV	1	077-KRAS-75	48.22	37	0	3393	7036	missense_variant	MODERATE	KRAS	3845	NM_004985	NM_004985.3:c.35G>A	c.35G>A	NP_004976.2:p.Gly12Asp	2/5		35	12	G/D	gGt/gAt			deleterious(0)	benign(0.202)	pathogenic	12	25398284	C	T	chr12:25398284-25398284	SNV	1	077-KRAS-75	22.43	38	0	375	1672	missense_variant	MODERATE	KRAS
161	1602761	4	153249384	C	T	chr4:153249384-153249384	SNV	1	039-FBXW7-37	25.18	37	0	696	2764	missense_variant	MODERATE	FBXW7	55294	NM_033632	NM_033632.3:c.1394G>A	c.1394G>A	NP_361014.1:p.Arg465His	9/12		1394	465	R/H	cGt/cAt			deleterious(0)	probably_damaging(0.998)
162	1602761	3	178936095	A	C	chr3:178936095-178936095	SNV	1	027-PIK3CA	50.97	37	0	2576	5054	missense_variant	MODERATE	PIK3CA	5290	NM_006218	NM_006218.2:c.1637A>C	c.1637A>C	NP_006209.2:p.Gln546Pro	10/21		1637	546	Q/P	cAg/cCg			deleterious(0.01)	probably_damaging(0.993)		3	178936095	A	C	chr3:178936095-178936095	SNV	1	027-PIK3CA	23.77	38	0	401	1687	missense_variant	MODERATE	PIK3CA
163	1602761	17	7578416	C	A	chr17:7578416-7578416	SNV	1	084-TP53-82	75.17	36	0	766	1019	missense_variant	MODERATE	TP53	7157	NM_000546	NM_000546.5:c.514G>T	c.514G>T	NP_000537.3:p.Val172Phe	5/11		514	172	V/F	Gtt/Ttt			deleterious(0)	probably_damaging(0.984)		17	7578416	C	A	chr17:7578416-7578416	SNV	1	084-TP53-82	34.04	38	0.01	449	1319	missense_variant	MODERATE	TP53
164	1602955	17	7578190	T	C	chr17:7578190-7578190	SNV	1	083-TP53-81	54.91	37	0	610	1111	missense_variant	MODERATE	TP53	7157	NM_000546	NM_000546.5:c.659A>G	c.659A>G	NP_000537.3:p.Tyr220Cys	6/11		659	220	Y/C	tAt/tGt			deleterious(0)	probably_damaging(1)	likely_pathogenic&pathogenic	17	7578190	T	C	chr17:7578190-7578190	SNV	1	083-TP53-81	15.18	38	-0.01	495	3261	missense_variant	MODERATE	TP53
165	1602955	15	66727455	G	T	chr15:66727455-66727455	SNV	1	079-MAP2K1-77	35.61	36	0	1928	5414	missense_variant	MODERATE	MAP2K1	5604	NM_002755	NM_002755.3:c.171G>T	c.171G>T	NP_002746.1:p.Lys57Asn	2/11		171	57	K/N	aaG/aaT			deleterious(0)	probably_damaging(0.994)	pathogenic	15	66727455	G	T	chr15:66727455-66727455	SNV	1	079-MAP2K1-77	12.1	38	0	687	5680	missense_variant	MODERATE	MAP2K1
166	1602995	12	25398284	C	A	chr12:25398284-25398284	SNV	1	077-KRAS-75	5.51	37	0	319	5787	missense_variant	MODERATE	KRAS	3845	NM_004985	NM_004985.3:c.35G>T	c.35G>T	NP_004976.2:p.Gly12Val	2/5		35	12	G/V	gGt/gTt			deleterious(0)	probably_damaging(0.958)	pathogenic	12	25398284	C	A	chr12:25398284-25398284	SNV	1	077-KRAS-75	22.44	37	0	617	2749	missense_variant	MODERATE	KRAS
167	1602995	4	153249385	G	A	chr4:153249385-153249385	SNV	1	039-FBXW7-37	14.44	37	0	407	2818	missense_variant	MODERATE	FBXW7	55294	NM_033632	NM_033632.3:c.1393C>T	c.1393C>T	NP_361014.1:p.Arg465Cys	9/12		1393	465	R/C	Cgt/Tgt			deleterious(0)	probably_damaging(1)		4	153249385	G	A	chr4:153249385-153249385	SNV	1	039-FBXW7-37	40.72	38	0	1592	3910	missense_variant	MODERATE	FBXW7
168	1602995																																	17	7578413	C	T	chr17:7578413-7578413	SNV	1	084-TP53-82	32.53	37	0.02	808	2484	missense_variant	MODERATE	TP53
169	1603876	12	25398284	C	T	chr12:25398284-25398284	SNV	1	077-KRAS-75	17.75	37	0	921	5190	missense_variant	MODERATE	KRAS	3845	NM_004985	NM_004985.3:c.35G>A	c.35G>A	NP_004976.2:p.Gly12Asp	2/5		35	12	G/D	gGt/gAt			deleterious(0)	benign(0.202)	pathogenic	12	25398284	C	T	chr12:25398284-25398284	SNV	1	077-KRAS-75	39.71	38	0	1825	4596	missense_variant	MODERATE	KRAS
170	1603876																																	7	55241707	G	C	chr7:55241707-55241707	SNV	1	046-EGFR-44	34.67	38	0	2521	7271	missense_variant	MODERATE	EGFR
171	1603876																																	10	89717681	N	NC	chr10:89717681-89717682	Insertion	1	068-PTEN-66	49.52	38	0	1562	3154	frameshift_variant	HIGH	PTEN
172	1603876																																	17	7577121	G	A	chr17:7577121-7577121	SNV	1	081-TP53-79	52.19	38	0	1468	2813	missense_variant	MODERATE	TP53
173	1604240	3	178936091	G	A	chr3:178936091-178936091	SNV	1	027-PIK3CA	70.98	37	0	5867	8266	missense_variant	MODERATE	PIK3CA	5290	NM_006218	NM_006218.2:c.1633G>A	c.1633G>A	NP_006209.2:p.Glu545Lys	10/21		1633	545	E/K	Gag/Aag			deleterious(0.02)	probably_damaging(0.959)	not_provided&pathogenic	3	178936091	G	A	chr3:178936091-178936091	SNV	1	027-PIK3CA	71.31	37	0	5706	8002	missense_variant	MODERATE	PIK3CA
174	1604240	17	7578475	G	A	chr17:7578475-7578475	SNV	1	084-TP53-82	53.67	36	0	570	1062	missense_variant	MODERATE	TP53	7157	NM_000546	NM_000546.5:c.455C>T	c.455C>T	NP_000537.3:p.Pro152Leu	5/11		455	152	P/L	cCg/cTg	5G		tolerated(0.08)	probably_damaging(0.91)	pathogenic	17	7578475	G	A	chr17:7578475-7578475	SNV	1	084-TP53-82	63.24	37	0	2149	3398	missense_variant	MODERATE	TP53
175	1605386	17	7578406	C	T	chr17:7578406-7578406	SNV	1	084-TP53-82	17.4	36	-0.03	273	1569	missense_variant	MODERATE	TP53	7157	NM_000546	NM_000546.5:c.524G>A	c.524G>A	NP_000537.3:p.Arg175His	5/11		524	175	R/H	cGc/cAc			tolerated(0.11)	benign(0.308)	pathogenic	17	7578406	C	T	chr17:7578406-7578406	SNV	1	084-TP53-82	25.43	37	0	762	2997	missense_variant	MODERATE	TP53
176	1605611																																	17	7578369	NC	N	chr17:7578370-7578370	Deletion	1	084-TP53-82	19.01	36	0	604	3178	splice_donor_variant	HIGH	TP53
177	1606047																																	17	7574018	G	A	chr17:7574018-7574018	SNV	1	080-TP53-78	37.5	39	0	447	1192	missense_variant	MODERATE	TP53
178	1606492	17	7577538	C	T	chr17:7577538-7577538	SNV	1	082-TP53-80	56.27	37	0	471	837	missense_variant	MODERATE	TP53	7157	NM_000546	NM_000546.5:c.743G>A	c.743G>A	NP_000537.3:p.Arg248Gln	7/11		743	248	R/Q	cGg/cAg			deleterious(0)	probably_damaging(1)	uncertain_significance&likely_pathogenic&pathogenic	17	7577538	C	T	chr17:7577538-7577538	SNV	1	082-TP53-80	36.53	37	0	621	1700	missense_variant	MODERATE	TP53
179	1606546	12	25398281	C	T	chr12:25398281-25398281	SNV	1	077-KRAS-75	19.55	39	0	1299	6646	missense_variant	MODERATE	KRAS	3845	NM_004985	NM_004985.3:c.38G>A	c.38G>A	NP_004976.2:p.Gly13Asp	2/5		38	13	G/D	gGc/gAc			deleterious(0.04)	benign(0.266)	pathogenic	12	25398281	C	T	chr12:25398281-25398281	SNV	1	077-KRAS-75	31.69	37	0	949	2995	missense_variant	MODERATE	KRAS
180	1606546																																	4	153245453	G	A	chr4:153245453-153245453	SNV	1	037-FBXW7-35	17.96	37	0	215	1197	missense_variant	MODERATE	FBXW7
181	1606546																																	4	153258983	G	A	chr4:153258983-153258983	SNV	1	041-FBXW7-39	20.38	37	-0.01	405	1987	stop_gained	HIGH	FBXW7
182	1606546																																	3	178952085	A	G	chr3:178952085-178952085	SNV	1	030-PIK3CA_sg24	20.24	37	0	708	3498	missense_variant	MODERATE	PIK3CA
183	1606757	12	25398284	C	T	chr12:25398284-25398284	SNV	1	077-KRAS-75	29.56	37	0	1879	6357	missense_variant	MODERATE	KRAS	3845	NM_004985	NM_004985.3:c.35G>A	c.35G>A	NP_004976.2:p.Gly12Asp	2/5		35	12	G/D	gGt/gAt			deleterious(0)	benign(0.202)	pathogenic	12	25398284	C	T	chr12:25398284-25398284	SNV	1	077-KRAS-75	45.22	37	0	2898	6409	missense_variant	MODERATE	KRAS
184	1606757	18	48591919	G	A	chr18:48591919-48591919	SNV	1	096-SMAD4-94	37.75	37	0	1667	4416	missense_variant	MODERATE	SMAD4	4089	NM_005359	NM_005359.5:c.1082G>A	c.1082G>A	NP_005350.1:p.Arg361His	9/12		1082	361	R/H	cGc/cAc			deleterious(0.03)	probably_damaging(1)	pathogenic	18	48591919	G	A	chr18:48591919-48591919	SNV	1	096-SMAD4-94	56.82	37	0	2952	5195	missense_variant	MODERATE	SMAD4
185	1606757	3	178916944	A	G	chr3:178916944-178916944	SNV	1	023-PIK3CA	19.18	37	0	943	4916	missense_variant	MODERATE	PIK3CA	5290	NM_006218	NM_006218.2:c.331A>G	c.331A>G	NP_006209.2:p.Lys111Glu	2/21		331	111	K/E	Aag/Gag	4A		deleterious(0.03)	probably_damaging(0.983)		3	178916944	A	G	chr3:178916944-178916944	SNV	1	023-PIK3CA	27.62	37	-0.01	1114	4033	missense_variant	MODERATE	PIK3CA
186	1607234	17	7578406	C	T	chr17:7578406-7578406	SNV	1	084-TP53-82	29.12	36	-0.05	461	1583	missense_variant	MODERATE	TP53	7157	NM_000546	NM_000546.5:c.524G>A	c.524G>A	NP_000537.3:p.Arg175His	5/11		524	175	R/H	cGc/cAc			tolerated(0.11)	benign(0.308)	pathogenic	17	7578406	C	T	chr17:7578406-7578406	SNV	1	084-TP53-82	27.7	38	0	210	758	missense_variant	MODERATE	TP53
187	1607928	1	115258744	C	A	chr1:115258744-115258744	SNV	1	003-NRAS	7.76	37	0	225	2899	missense_variant	MODERATE	NRAS	4893	NM_002524	NM_002524.4:c.38G>T	c.38G>T	NP_002515.1:p.Gly13Val	2/7		38	13	G/V	gGt/gTt			deleterious(0.02)	benign(0.432)	pathogenic	1	115258744	C	A	chr1:115258744-115258744	SNV	1	003-NRAS	27.03	38	0	1459	5397	missense_variant	MODERATE	NRAS
188	1607928																																	17	7578406	C	T	chr17:7578406-7578406	SNV	1	084-TP53-82	39.72	37	0.01	1250	3147	missense_variant	MODERATE	TP53
189	1608453	12	25398284	C	T	chr12:25398284-25398284	SNV	1	077-KRAS-75	21.06	37	0	1279	6074	missense_variant	MODERATE	KRAS	3845	NM_004985	NM_004985.3:c.35G>A	c.35G>A	NP_004976.2:p.Gly12Asp	2/5		35	12	G/D	gGt/gAt			deleterious(0)	benign(0.202)	pathogenic	12	25398284	C	T	chr12:25398284-25398284	SNV	1	077-KRAS-75	17.85	38	0	530	2970	missense_variant	MODERATE	KRAS
190	1608453	17	7577121	G	A	chr17:7577121-7577121	SNV	1	081-TP53-79	22.9	36	0	494	2157	missense_variant	MODERATE	TP53	7157	NM_000546	NM_000546.5:c.817C>T	c.817C>T	NP_000537.3:p.Arg273Cys	8/11		817	273	R/C	Cgt/Tgt			deleterious(0)	probably_damaging(0.998)	uncertain_significance&pathogenic
191	1608453	7	55241707	G	C	chr7:55241707-55241707	SNV	1	046-EGFR-44	19.08	37	0	611	3203	missense_variant	MODERATE	EGFR	1956	NM_005228	NM_005228.3:c.2155G>C	c.2155G>C	NP_005219.2:p.Gly719Arg	18/28		2155	719	G/R	Ggc/Cgc			deleterious(0)	probably_damaging(0.994)	likely_pathogenic&pathogenic&drug_response
192	1608453	10	89717682	A	AC	chr10:89717682-89717683	Insertion	1	068-PTEN-66	23.29	36	0	871	3739	frameshift_variant	HIGH	PTEN	5728	NM_000314	NM_000314.4:c.708dupC	c.708dupC	NP_000305.3:p.Lys237GlnfsTer6	7/9		707-708	236	D/DX	gac/gaCc		1
193	1608833	17	7578442	T	C	chr17:7578442-7578442	SNV	1	084-TP53-82	56.58	36	0	843	1490	missense_variant	MODERATE	TP53	7157	NM_000546	NM_000546.5:c.488A>G	c.488A>G	NP_000537.3:p.Tyr163Cys	5/11		488	163	Y/C	tAc/tGc			deleterious(0)	probably_damaging(0.999)	pathogenic	17	7578442	T	C	chr17:7578442-7578442	SNV	1	084-TP53-82	45.05	37	0	873	1938	missense_variant	MODERATE	TP53
194	1608845	17	7578526	C	T	chr17:7578526-7578526	SNV	1	085-TP53-83	36.48	37	0.03	561	1538	missense_variant	MODERATE	TP53	7157	NM_000546	NM_000546.5:c.404G>A	c.404G>A	NP_000537.3:p.Cys135Tyr	5/11		404	135	C/Y	tGc/tAc	4A-1		deleterious(0)	probably_damaging(1)	likely_pathogenic	17	7578526	C	T	chr17:7578526-7578526	SNV	1	085-TP53-83	44.79	38	-0.01	787	1757	missense_variant	MODERATE	TP53
195	1609072	12	25398285	C	A	chr12:25398285-25398285	SNV	1	077-KRAS-75	21.39	37	0	1546	7228	missense_variant	MODERATE	KRAS	3845	NM_004985	NM_004985.3:c.34G>T	c.34G>T	NP_004976.2:p.Gly12Cys	2/5		34	12	G/C	Ggt/Tgt			deleterious(0.02)	probably_damaging(0.975)	not_provided&pathogenic
196	1609072	17	7578395	G	A	chr17:7578395-7578395	SNV	1	084-TP53-82	56.3	36	0	769	1366	missense_variant	MODERATE	TP53	7157	NM_000546	NM_000546.5:c.535C>T	c.535C>T	NP_000537.3:p.His179Tyr	5/11		535	179	H/Y	Cat/Tat			deleterious(0)	probably_damaging(1)	pathogenic
197	1609072																																	17	7578550	NAGTACTGT	N	chr17:7578551-7578558	Deletion	8	085-TP53-83	28.34	38	0.015	475	1675	splice_acceptor_variant&coding_sequence_variant&intron_variant	HIGH	TP53
198	1609560	12	25398284	C	T	chr12:25398284-25398284	SNV	1	077-KRAS-75	21.7	37	0	1846	8506	missense_variant	MODERATE	KRAS	3845	NM_004985	NM_004985.3:c.35G>A	c.35G>A	NP_004976.2:p.Gly12Asp	2/5		35	12	G/D	gGt/gAt			deleterious(0)	benign(0.202)	pathogenic	12	25398284	C	T	chr12:25398284-25398284	SNV	1	077-KRAS-75	34.08	37	0	1367	4011	missense_variant	MODERATE	KRAS
199	1609560	17	7578263	G	A	chr17:7578263-7578263	SNV	1	083-TP53-81	14.62	36	0.01	231	1580	stop_gained	HIGH	TP53	7157	NM_000546	NM_000546.5:c.586C>T	c.586C>T	NP_000537.3:p.Arg196Ter	6/11		586	196	R/*	Cga/Tga					uncertain_significance&pathogenic	17	7578263	G	A	chr17:7578263-7578263	SNV	1	083-TP53-81	36.83	37	0	1211	3288	stop_gained	HIGH	TP53
200	1609769	12	25380279	C	T	chr12:25380279-25380279	SNV	1	076-KRAS-74	13.39	39	0	499	3727	missense_variant	MODERATE	KRAS	3845	NM_004985	NM_004985.3:c.179G>A	c.179G>A	NP_004976.2:p.Gly60Asp	3/5		179	60	G/D	gGt/gAt			deleterious(0)	probably_damaging(1)
201	1609769	17	7577535	C	A	chr17:7577535-7577535	SNV	1	082-TP53-80	11.66	38	0	214	1836	missense_variant	MODERATE	TP53	7157	NM_000546	NM_000546.5:c.746G>T	c.746G>T	NP_000537.3:p.Arg249Met	7/11		746	249	R/M	aGg/aTg			deleterious(0)	probably_damaging(0.993)
202	1610446	1	115258747	C	T	chr1:115258747-115258747	SNV	1	003-NRAS	30.03	37	0	696	2318	missense_variant	MODERATE	NRAS	4893	NM_002524	NM_002524.4:c.35G>A	c.35G>A	NP_002515.1:p.Gly12Asp	2/7		35	12	G/D	gGt/gAt			deleterious(0)	possibly_damaging(0.726)	pathogenic
203	1610446	3	178927980	T	C	chr3:178927980-178927980	SNV	1	026-PIK3CA	27.98	36	-0.01	659	2355	missense_variant	MODERATE	PIK3CA	5290	NM_006218	NM_006218.2:c.1258T>C	c.1258T>C	NP_006209.2:p.Cys420Arg	8/21		1258	420	C/R	Tgt/Cgt			tolerated(0.21)	possibly_damaging(0.893)	pathogenic
204	1610446																																	3	178952085	A	G	chr3:178952085-178952085	SNV	1	030-PIK3CA_sg24	32.81	37	0.01	1209	3685	missense_variant	MODERATE	PIK3CA
205	1610446																																	17	7578265	A	G	chr17:7578265-7578265	SNV	1	083-TP53-81	67.76	37	0	2493	3679	missense_variant	MODERATE	TP53
206	1610663	3	178952085	A	G	chr3:178952085-178952085	SNV	1	030-PIK3CA_sg24	21.39	37	-0.01	707	3305	missense_variant	MODERATE	PIK3CA	5290	NM_006218	NM_006218.2:c.3140A>G	c.3140A>G	NP_006209.2:p.His1047Arg	21/21		3140	1047	H/R	cAt/cGt			tolerated(0.11)	possibly_damaging(0.529)	pathogenic
207	1610663	17	7578265	A	G	chr17:7578265-7578265	SNV	1	083-TP53-81	46.85	36	0	937	2000	missense_variant	MODERATE	TP53	7157	NM_000546	NM_000546.5:c.584T>C	c.584T>C	NP_000537.3:p.Ile195Thr	6/11		584	195	I/T	aTc/aCc			deleterious(0)	probably_damaging(1)	pathogenic
208	1610663																																	1	115258747	C	T	chr1:115258747-115258747	SNV	1	003-NRAS	22.71	37	0.01	917	4037	missense_variant	MODERATE	NRAS
209	1610663																																	3	178927980	T	C	chr3:178927980-178927980	SNV	1	026-PIK3CA	33.48	37	0	2451	7320	missense_variant	MODERATE	PIK3CA
210	1611850	12	25398284	C	A	chr12:25398284-25398284	SNV	1	077-KRAS-75	30.97	37	0	1869	6034	missense_variant	MODERATE	KRAS	3845	NM_004985	NM_004985.3:c.35G>T	c.35G>T	NP_004976.2:p.Gly12Val	2/5		35	12	G/V	gGt/gTt			deleterious(0)	probably_damaging(0.958)	pathogenic
211	1611850	17	7574003	G	A	chr17:7574003-7574003	SNV	1	080-TP53-78	24.29	37	0	880	3623	stop_gained	HIGH	TP53	7157	NM_000546	NM_000546.5:c.1024C>T	c.1024C>T	NP_000537.3:p.Arg342Ter	10/11		1024	342	R/*	Cga/Tga					pathogenic	17	7574003	G	A	chr17:7574003-7574003	SNV	1	080-TP53-78	27.76	37	0	644	2320	stop_gained	HIGH	TP53
212	1611850	3	178921477	G	A	chr3:178921477-178921477	SNV	1	024-PIK3CA	18.04	37	0	1073	5947	missense_variant	MODERATE	PIK3CA	5290	NM_006218	NM_006218.2:c.959G>A	c.959G>A	NP_006209.2:p.Gly320Glu	5/21		959	320	G/E	gGa/gAa			tolerated(1)	possibly_damaging(0.56)
213	1612036																																	12	25398284	C	A	chr12:25398284-25398284	SNV	1	077-KRAS-75	32.45	38	0	816	2515	missense_variant	MODERATE	KRAS
214	1612036																																	3	178921477	G	A	chr3:178921477-178921477	SNV	1	024-PIK3CA	21.85	39	0	364	1666	missense_variant	MODERATE	PIK3CA
215	1612036																																	17	7574003	G	A	chr17:7574003-7574003	SNV	1	080-TP53-78	29.78	39	0	399	1340	stop_gained	HIGH	TP53
216	1612784																																	3	178927980	T	C	chr3:178927980-178927980	SNV	1	026-PIK3CA	8.62	37	0	397	4605	missense_variant	MODERATE	PIK3CA
217	1612784																																	17	7577548	C	T	chr17:7577548-7577548	SNV	1	082-TP53-80	13.11	38	0	273	2082	missense_variant	MODERATE	TP53
218	1616102	17	7577548	C	T	chr17:7577548-7577548	SNV	1	082-TP53-80	50.04	37	0	646	1291	missense_variant	MODERATE	TP53	7157	NM_000546	NM_000546.5:c.733G>A	c.733G>A	NP_000537.3:p.Gly245Ser	7/11		733	245	G/S	Ggc/Agc			deleterious(0)	probably_damaging(1)	likely_pathogenic&pathogenic	17	7577548	C	T	chr17:7577548-7577548	SNV	1	082-TP53-80	52.03	38	0	769	1478	missense_variant	MODERATE	TP53
219	1616301	17	7577121	G	A	chr17:7577121-7577121	SNV	1	081-TP53-79	15.86	38	0	311	1961	missense_variant	MODERATE	TP53	7157	NM_000546	NM_000546.5:c.817C>T	c.817C>T	NP_000537.3:p.Arg273Cys	8/11		817	273	R/C	Cgt/Tgt			deleterious(0)	probably_damaging(0.998)	uncertain_significance&pathogenic
220	1616301	4	153247289	G	A	chr4:153247289-153247289	SNV	1	038-FBXW7-36	12.94	39	0	852	6582	missense_variant	MODERATE	FBXW7	55294	NM_033632	NM_033632.3:c.1513C>T	c.1513C>T	NP_361014.1:p.Arg505Cys	10/12		1513	505	R/C	Cgc/Tgc			deleterious(0)	probably_damaging(1)
221	1616301	12	25380283	C	T	chr12:25380283-25380283	SNV	1	076-KRAS-74	13.49	38	0	799	5923	missense_variant	MODERATE	KRAS	3845	NM_004985	NM_004985.3:c.175G>A	c.175G>A	NP_004976.2:p.Ala59Thr	3/5		175	59	A/T	Gca/Aca			deleterious(0.05)	benign(0.227)	likely_pathogenic&pathogenic
222	1616301																																	17	7578433	G	C	chr17:7578433-7578433	SNV	1	084-TP53-82	29.47	37	0	453	1537	stop_gained	HIGH	TP53
223	1616565	17	7578406	C	T	chr17:7578406-7578406	SNV	1	084-TP53-82	37.93	36	0.02	264	696	missense_variant	MODERATE	TP53	7157	NM_000546	NM_000546.5:c.524G>A	c.524G>A	NP_000537.3:p.Arg175His	5/11		524	175	R/H	cGc/cAc			tolerated(0.11)	benign(0.308)	pathogenic	17	7578406	C	T	chr17:7578406-7578406	SNV	1	084-TP53-82	42.03	37	0.01	1522	3621	missense_variant	MODERATE	TP53
224	1616565	7	140453136	A	T	chr7:140453136-140453136	SNV	1	056-BRAF-54	28.71	37	0	885	3083	missense_variant	MODERATE	BRAF	673	NM_004333	NM_004333.4:c.1799T>A	c.1799T>A	NP_004324.2:p.Val600Glu	15/18		1799	600	V/E	gTg/gAg			deleterious(0)	probably_damaging(0.967)	pathogenic	7	140453136	A	T	chr7:140453136-140453136	SNV	1	056-BRAF-54	28.05	37	-0.01	1453	5180	missense_variant	MODERATE	BRAF
225	1619600																																	17	7577120	C	T	chr17:7577120-7577120	SNV	1	081-TP53-79	52.72	37	0	1191	2259	missense_variant	MODERATE	TP53
226	1620060	3	178936082	G	A	chr3:178936082-178936082	SNV	1	027-PIK3CA	15.77	39	0	550	3487	missense_variant	MODERATE	PIK3CA	5290	NM_006218	NM_006218.2:c.1624G>A	c.1624G>A	NP_006209.2:p.Glu542Lys	10/21		1624	542	E/K	Gaa/Aaa	4CT+1		deleterious(0.04)	probably_damaging(0.96)	pathogenic	3	178936082	G	A	chr3:178936082-178936082	SNV	1	027-PIK3CA	21.99	39	0	470	2137	missense_variant	MODERATE	PIK3CA
227	1620060	10	89692898	A	G	chr10:89692898-89692898	SNV	1	064-PTEN-62	14.56	38	0	333	2287	missense_variant	MODERATE	PTEN	5728	NM_000314	NM_000314.4:c.382A>G	c.382A>G	NP_000305.3:p.Lys128Glu	5/9		382	128	K/E	Aag/Gag			deleterious(0)	probably_damaging(0.999)		10	89692898	A	G	chr10:89692898-89692898	SNV	1	064-PTEN-62	20.59	39	0	360	1748	missense_variant	MODERATE	PTEN
228	1620060	2	212812165	C	A	chr2:212812165-212812165	SNV	1	021-ERBB4	13.67	39	0	640	4683	missense_variant	MODERATE	ERBB4	2066	NM_005235	NM_005235.2:c.411G>T	c.411G>T	NP_005226.1:p.Lys137Asn	3/28		411	137	K/N	aaG/aaT			tolerated(0.18)	benign(0.009)		2	212812165	C	A	chr2:212812165-212812165	SNV	1	021-ERBB4	20.84	39	0	376	1804	missense_variant	MODERATE	ERBB4
229	1620060	10	89624258	G	T	chr10:89624258-89624258	SNV	1	062-PTEN-60	10.83	39	0	407	3757	missense_variant	MODERATE	PTEN	5728	NM_000314	NM_000314.4:c.32G>T	c.32G>T	NP_000305.3:p.Arg11Ile	1/9		32	11	R/I	aGa/aTa			deleterious(0)	benign(0.058)		10	89624258	G	T	chr10:89624258-89624258	SNV	1	062-PTEN-60	18.84	39	0	346	1837	missense_variant	MODERATE	PTEN
230	1620060	15	66727423	C	T	chr15:66727423-66727423	SNV	1	079-MAP2K1-77	13.63	39	0	1277	9372	stop_gained	HIGH	MAP2K1	5604	NM_002755	NM_002755.3:c.139C>T	c.139C>T	NP_002746.1:p.Arg47Ter	2/11		139	47	R/*	Cga/Tga						15	66727423	C	T	chr15:66727423-66727423	SNV	1	079-MAP2K1-77	20.57	39	0	377	1833	stop_gained	HIGH	MAP2K1
231	1620060																																	17	7578389	G	A	chr17:7578389-7578389	SNV	1	084-TP53-82	20.92	39	0	214	1023	missense_variant	MODERATE	TP53
232	1621673	12	25398284	C	T	chr12:25398284-25398284	SNV	1	077-KRAS-75	33.98	37	0	1490	4385	missense_variant	MODERATE	KRAS	3845	NM_004985	NM_004985.3:c.35G>A	c.35G>A	NP_004976.2:p.Gly12Asp	2/5		35	12	G/D	gGt/gAt			deleterious(0)	benign(0.202)	pathogenic	12	25398284	C	T	chr12:25398284-25398284	SNV	1	077-KRAS-75	26.14	37	0	1839	7035	missense_variant	MODERATE	KRAS
233	1621673	18	48591919	G	A	chr18:48591919-48591919	SNV	1	096-SMAD4-94	30.68	37	-0.01	1069	3484	missense_variant	MODERATE	SMAD4	4089	NM_005359	NM_005359.5:c.1082G>A	c.1082G>A	NP_005350.1:p.Arg361His	9/12		1082	361	R/H	cGc/cAc			deleterious(0.03)	probably_damaging(1)	pathogenic	18	48591919	G	A	chr18:48591919-48591919	SNV	1	096-SMAD4-94	24.64	37	-0.01	1187	4818	missense_variant	MODERATE	SMAD4
234	1621673	17	7578378	ATCTGAGCAGCGCTCATGGTGGGGGCAGCGCCTC	A	chr17:7578379-7578411	Deletion	33	084-TP53-82	37.24	36	-0.005	417	1119	inframe_deletion	MODERATE	TP53	7157	NM_000546	NM_000546.5:c.519_551delGAGGCGCTGCCCCCACCATGAGCGCTGCTCAGA	c.519_551delGAGG	NP_000537.3:p.Arg174_Asp184del	5/11		519-551	173-184	VRRCPHHERCSD/V	gtGAGGCGCTGCCCCCACCATGAGCGCTGCTCAGAt/gtt	_5G-1_5G+1_5G					17	7578378	NTCTGAGCAGCGCTCATGGTGGGGGCAGCGCCTC	N	chr17:7578379-7578411	Deletion	33	084-TP53-82	28.42	37	0.015	689	2426	inframe_deletion	MODERATE	TP53
235	1621673																																	4	153247366	C	T	chr4:153247366-153247366	SNV	1	038-FBXW7-36	15.88	37	0	840	5291	missense_variant	MODERATE	FBXW7
236	1621706	12	25398284	C	A	chr12:25398284-25398284	SNV	1	077-KRAS-75	36.62	37	0	1213	3312	missense_variant	MODERATE	KRAS	3845	NM_004985	NM_004985.3:c.35G>T	c.35G>T	NP_004976.2:p.Gly12Val	2/5		35	12	G/V	gGt/gTt			deleterious(0)	probably_damaging(0.958)	pathogenic	12	25398284	C	A	chr12:25398284-25398284	SNV	1	077-KRAS-75	37.23	38	0	475	1276	missense_variant	MODERATE	KRAS
237	1621706	3	178916876	G	A	chr3:178916876-178916876	SNV	1	023-PIK3CA	33.82	37	0	1171	3462	missense_variant	MODERATE	PIK3CA	5290	NM_006218	NM_006218.2:c.263G>A	c.263G>A	NP_006209.2:p.Arg88Gln	2/21		263	88	R/Q	cGa/cAa			tolerated(0.06)	probably_damaging(0.998)		3	178916876	G	A	chr3:178916876-178916876	SNV	1	023-PIK3CA	33.9	39	0	540	1593	missense_variant	MODERATE	PIK3CA
238	1621706	17	7578271	T	C	chr17:7578271-7578271	SNV	1	083-TP53-81	43.62	37	0	499	1144	missense_variant	MODERATE	TP53	7157	NM_000546	NM_000546.5:c.578A>G	c.578A>G	NP_000537.3:p.His193Arg	6/11		578	193	H/R	cAt/cGt			deleterious(0)	probably_damaging(1)	likely_pathogenic	17	7578271	T	C	chr17:7578271-7578271	SNV	1	083-TP53-81	43.43	38	0.01	410	944	missense_variant	MODERATE	TP53
239	1622094	3	178916876	G	A	chr3:178916876-178916876	SNV	1	023-PIK3CA	10.59	39	0	325	3068	missense_variant	MODERATE	PIK3CA	5290	NM_006218	NM_006218.2:c.263G>A	c.263G>A	NP_006209.2:p.Arg88Gln	2/21		263	88	R/Q	cGa/cAa			tolerated(0.06)	probably_damaging(0.998)		3	178916876	G	A	chr3:178916876-178916876	SNV	1	023-PIK3CA	18.28	37	0	437	2390	missense_variant	MODERATE	PIK3CA
240	1622094	12	25378562	C	T	chr12:25378562-25378562	SNV	1	075-KRAS-73	21.13	39	0	1380	6532	missense_variant	MODERATE	KRAS	3845	NM_004985	NM_004985.3:c.436G>A	c.436G>A	NP_004976.2:p.Ala146Thr	4/5		436	146	A/T	Gca/Aca			deleterious(0.03)	possibly_damaging(0.843)	uncertain_significance	12	25378562	C	T	chr12:25378562-25378562	SNV	1	075-KRAS-73	19.81	37	0	907	4578	missense_variant	MODERATE	KRAS
241	1622094	2	212812236	G	A	chr2:212812236-212812236	SNV	1	021-ERBB4	13.3	39	0	821	6174	stop_gained	HIGH	ERBB4	2066	NM_005235	NM_005235.2:c.340C>T	c.340C>T	NP_005226.1:p.Arg114Ter	3/28		340	114	R/*	Cga/Tga						2	212812236	G	A	chr2:212812236-212812236	SNV	1	021-ERBB4	28.62	37	0	1176	4109	stop_gained	HIGH	ERBB4
242	1622094	10	89624245	G	T	chr10:89624245-89624245	SNV	1	062-PTEN-60	16.93	39	0	709	4187	stop_gained	HIGH	PTEN	5728	NM_000314	NM_000314.4:c.19G>T	c.19G>T	NP_000305.3:p.Glu7Ter	1/9		19	7	E/*	Gag/Tag						10	89624245	G	T	chr10:89624245-89624245	SNV	1	062-PTEN-60	29.24	37	0.02	1243	4251	stop_gained	HIGH	PTEN
243	1622094	10	123279621	C	T	chr10:123279621-123279621	SNV	1	074-FGFR2-72	17.19	39	-0.03	473	2751	missense_variant	MODERATE	FGFR2	2263	NM_000141	NM_000141.4:c.811G>A	c.811G>A	NP_000132.3:p.Gly271Arg	7/18		811	271	G/R	Gga/Aga			deleterious(0)	probably_damaging(0.909)		10	123279621	C	T	chr10:123279621-123279621	SNV	1	074-FGFR2-72	33.1	37	0.01	1722	5202	missense_variant	MODERATE	FGFR2
244	1622094																																	2	212530085	G	A	chr2:212530085-212530085	SNV	1	015-ERBB4	10.69	37	0	551	5152	missense_variant	MODERATE	ERBB4
245	1622094																																	10	89711900	G	A	chr10:89711900-89711900	SNV	1	066-PTEN-64	9.45	37	0.01	287	3038	missense_variant	MODERATE	PTEN
246	1622094																																	18	48575125	A	C	chr18:48575125-48575125	SNV	1	091-SMAD4-89	11.11	37	-0.01	422	3797	missense_variant	MODERATE	SMAD4
247	1622096	1	115256529	T	A	chr1:115256529-115256529	SNV	1	002-NRAS	19.04	37	0	339	1780	missense_variant	MODERATE	NRAS	4893	NM_002524	NM_002524.4:c.182A>T	c.182A>T	NP_002515.1:p.Gln61Leu	3/7		182	61	Q/L	cAa/cTa			deleterious(0)	benign(0.109)	pathogenic
248	1622096	17	7578403	C	A	chr17:7578403-7578403	SNV	1	084-TP53-82	27.22	36	0	230	845	missense_variant	MODERATE	TP53	7157	NM_000546	NM_000546.5:c.527G>T	c.527G>T	NP_000537.3:p.Cys176Phe	5/11		527	176	C/F	tGc/tTc	5G+1		deleterious(0)	probably_damaging(0.993)		17	7578403	C	A	chr17:7578403-7578403	SNV	1	084-TP53-82	30.21	38	0.01	322	1066	missense_variant	MODERATE	TP53
249	1622544	17	7574012	C	A	chr17:7574012-7574012	SNV	1	080-TP53-78	50.02	36	0	1538	3075	stop_gained	HIGH	TP53	7157	NM_000546	NM_000546.5:c.1015G>T	c.1015G>T	NP_000537.3:p.Glu339Ter	10/11		1015	339	E/*	Gag/Tag						17	7574012	C	A	chr17:7574012-7574012	SNV	1	080-TP53-78	41.9	37	0	641	1530	stop_gained	HIGH	TP53
250	1623480	12	25398284	C	T	chr12:25398284-25398284	SNV	1	077-KRAS-75	30.93	38	0	966	3123	missense_variant	MODERATE	KRAS	3845	NM_004985	NM_004985.3:c.35G>A	c.35G>A	NP_004976.2:p.Gly12Asp	2/5		35	12	G/D	gGt/gAt			deleterious(0)	benign(0.202)	pathogenic	12	25398284	C	T	chr12:25398284-25398284	SNV	1	077-KRAS-75	17.71	37	0	900	5083	missense_variant	MODERATE	KRAS
251	1623480	3	178936091	G	A	chr3:178936091-178936091	SNV	1	027-PIK3CA	14.5	39	0	294	2027	missense_variant	MODERATE	PIK3CA	5290	NM_006218	NM_006218.2:c.1633G>A	c.1633G>A	NP_006209.2:p.Glu545Lys	10/21		1633	545	E/K	Gag/Aag			deleterious(0.02)	probably_damaging(0.959)	not_provided&pathogenic	3	178936091	G	A	chr3:178936091-178936091	SNV	1	027-PIK3CA	8.65	37	0.01	440	5087	missense_variant	MODERATE	PIK3CA
252	1623480	18	48591919	G	A	chr18:48591919-48591919	SNV	1	096-SMAD4-94	28.23	38	0	904	3202	missense_variant	MODERATE	SMAD4	4089	NM_005359	NM_005359.5:c.1082G>A	c.1082G>A	NP_005350.1:p.Arg361His	9/12		1082	361	R/H	cGc/cAc			deleterious(0.03)	probably_damaging(1)	pathogenic	18	48591919	G	A	chr18:48591919-48591919	SNV	1	096-SMAD4-94	17.2	37	-0.01	1072	6231	missense_variant	MODERATE	SMAD4
253	1623481	10	89685313	CTG	C	chr10:89685314-89685315	Deletion	2	063-PTEN-61	78.52	37	0	4215	5368	splice_donor_variant&coding_sequence_variant	HIGH	PTEN	5728	NM_000314	NM_000314.4:c.209+1_209+2delGT	c.209+1_209+2del		3/9	3/8	209-?	70-?				1				10	89685313	NTG	N	chr10:89685314-89685315	Deletion	2	063-PTEN-61	39.92	39	0	550	1377	splice_donor_variant&coding_sequence_variant	HIGH	PTEN
254	1624014	17	7577094	G	A	chr17:7577094-7577094	SNV	1	081-TP53-79	21.22	38	0	442	2083	missense_variant	MODERATE	TP53	7157	NM_000546	NM_000546.5:c.844C>T	c.844C>T	NP_000537.3:p.Arg282Trp	8/11		844	282	R/W	Cgg/Tgg			deleterious(0)	probably_damaging(0.997)	pathogenic	17	7577094	G	A	chr17:7577094-7577094	SNV	1	081-TP53-79	22.13	37	0	387	1749	missense_variant	MODERATE	TP53
255	1624014	1	115258747	C	T	chr1:115258747-115258747	SNV	1	003-NRAS	16.67	39	0	1048	6287	missense_variant	MODERATE	NRAS	4893	NM_002524	NM_002524.4:c.35G>A	c.35G>A	NP_002515.1:p.Gly12Asp	2/7		35	12	G/D	gGt/gAt			deleterious(0)	possibly_damaging(0.726)	pathogenic	1	115258747	C	T	chr1:115258747-115258747	SNV	1	003-NRAS	22.54	37	0	591	2622	missense_variant	MODERATE	NRAS
256	1624014	18	48604688	AGTT	A	chr18:48604689-48604691	Deletion	3	099-SMAD4-97	23.18	38	0	685	2955	inframe_deletion	MODERATE	SMAD4	4089	NM_005359	NM_005359.5:c.1511_1513delGTT	c.1511_1513delGT	NP_005350.1:p.Ser504_Phe505delinsIle	12/12		1511-1513	504-505	SF/I	aGTTtt/att	4T-1_4T					18	48604688	NGTT	N	chr18:48604689-48604691	Deletion	3	099-SMAD4-97	15.67	37	0	252	1610	inframe_deletion	MODERATE	SMAD4
257	1625316	12	25398281	C	T	chr12:25398281-25398281	SNV	1	077-KRAS-75	42.37	37	0	1314	3101	missense_variant	MODERATE	KRAS	3845	NM_004985	NM_004985.3:c.38G>A	c.38G>A	NP_004976.2:p.Gly13Asp	2/5		38	13	G/D	gGc/gAc			deleterious(0.04)	benign(0.266)	pathogenic	12	25398281	C	T	chr12:25398281-25398281	SNV	1	077-KRAS-75	24.9	38	0	749	3008	missense_variant	MODERATE	KRAS
258	1625316	3	178936091	G	A	chr3:178936091-178936091	SNV	1	027-PIK3CA	28.71	37	0	1683	5863	missense_variant	MODERATE	PIK3CA	5290	NM_006218	NM_006218.2:c.1633G>A	c.1633G>A	NP_006209.2:p.Glu545Lys	10/21		1633	545	E/K	Gag/Aag			deleterious(0.02)	probably_damaging(0.959)	not_provided&pathogenic	3	178936091	G	A	chr3:178936091-178936091	SNV	1	027-PIK3CA	21.94	37	0	1068	4868	missense_variant	MODERATE	PIK3CA
259	1625316	3	178936105	T	A	chr3:178936105-178936105	SNV	1	027-PIK3CA	28.49	37	0	1671	5865	missense_variant	MODERATE	PIK3CA	5290	NM_006218	NM_006218.2:c.1647T>A	c.1647T>A	NP_006209.2:p.Asp549Glu	10/21		1647	549	D/E	gaT/gaA	4T		tolerated(1)	benign(0.003)		3	178936105	T	A	chr3:178936105-178936105	SNV	1	027-PIK3CA	21.82	38	0	1063	4872	missense_variant	MODERATE	PIK3CA
260	1625316	17	7578191	AG	A	chr17:7578192-7578192	Deletion	1	083-TP53-81	37.99	36	0.01	476	1253	frameshift_variant	HIGH	TP53	7157	NM_000546	NM_000546.5:c.657delC	c.657delC	NP_000537.3:p.Tyr220MetfsTer27	6/11		657	219	P/X	ccC/cc						17	7578191	NG	N	chr17:7578192-7578192	Deletion	1	083-TP53-81	31.54	37	0	534	1693	frameshift_variant	HIGH	TP53
261	1625770	17	7578235	T	C	chr17:7578235-7578235	SNV	1	083-TP53-81	44.75	37	-0.02	644	1439	missense_variant	MODERATE	TP53	7157	NM_000546	NM_000546.5:c.614A>G	c.614A>G	NP_000537.3:p.Tyr205Cys	6/11		614	205	Y/C	tAt/tGt			deleterious(0)	probably_damaging(0.99)		17	7578235	T	C	chr17:7578235-7578235	SNV	1	083-TP53-81	60.93	37	0	970	1592	missense_variant	MODERATE	TP53
262	1626146	12	25398281	C	T	chr12:25398281-25398281	SNV	1	077-KRAS-75	55.39	37	0	4073	7353	missense_variant	MODERATE	KRAS	3845	NM_004985	NM_004985.3:c.38G>A	c.38G>A	NP_004976.2:p.Gly13Asp	2/5		38	13	G/D	gGc/gAc			deleterious(0.04)	benign(0.266)	pathogenic	12	25398281	C	T	chr12:25398281-25398281	SNV	1	077-KRAS-75	49.47	38	0	4320	8732	missense_variant	MODERATE	KRAS
263	1626146	17	7577130	A	C	chr17:7577130-7577130	SNV	1	081-TP53-79	29.81	37	0	510	1711	missense_variant	MODERATE	TP53	7157	NM_000546	NM_000546.5:c.808T>G	c.808T>G	NP_000537.3:p.Phe270Val	8/11		808	270	F/V	Ttt/Gtt			deleterious(0)	probably_damaging(0.995)		17	7577130	A	C	chr17:7577130-7577130	SNV	1	081-TP53-79	22.56	38	0	450	1995	missense_variant	MODERATE	TP53
264	1626559	12	25398284	C	T	chr12:25398284-25398284	SNV	1	077-KRAS-75	33.12	37	0	1665	5027	missense_variant	MODERATE	KRAS	3845	NM_004985	NM_004985.3:c.35G>A	c.35G>A	NP_004976.2:p.Gly12Asp	2/5		35	12	G/D	gGt/gAt			deleterious(0)	benign(0.202)	pathogenic	12	25398284	C	T	chr12:25398284-25398284	SNV	1	077-KRAS-75	22.74	37	0	671	2951	missense_variant	MODERATE	KRAS
265	1626559	18	48593405	G	C	chr18:48593405-48593405	SNV	1	097-SMAD4-95	19.32	37	0	389	2013	missense_variant	MODERATE	SMAD4	4089	NM_005359	NM_005359.5:c.1156G>C	c.1156G>C	NP_005350.1:p.Gly386Arg	10/12		1156	386	G/R	Ggt/Cgt			deleterious(0)	probably_damaging(1)		18	48593405	G	C	chr18:48593405-48593405	SNV	1	097-SMAD4-95	10.55	37	0	217	2057	missense_variant	MODERATE	SMAD4
266	1626559																																	17	7578406	C	T	chr17:7578406-7578406	SNV	1	084-TP53-82	11.97	37	0	221	1846	missense_variant	MODERATE	TP53
267	1626759	12	25398284	C	T	chr12:25398284-25398284	SNV	1	077-KRAS-75	17.77	38	0	1070	6023	missense_variant	MODERATE	KRAS	3845	NM_004985	NM_004985.3:c.35G>A	c.35G>A	NP_004976.2:p.Gly12Asp	2/5		35	12	G/D	gGt/gAt			deleterious(0)	benign(0.202)	pathogenic	12	25398284	C	T	chr12:25398284-25398284	SNV	1	077-KRAS-75	32.54	37	0	1758	5402	missense_variant	MODERATE	KRAS
268	1626759	12	25398281	C	T	chr12:25398281-25398281	SNV	1	077-KRAS-75	9.66	39	0	582	6024	missense_variant	MODERATE	KRAS	3845	NM_004985	NM_004985.3:c.38G>A	c.38G>A	NP_004976.2:p.Gly13Asp	2/5		38	13	G/D	gGc/gAc			deleterious(0.04)	benign(0.266)	pathogenic
269	1626759																																	17	7577120	C	T	chr17:7577120-7577120	SNV	1	081-TP53-79	42.15	37	0	1592	3777	missense_variant	MODERATE	TP53
270	1627392	12	25398284	C	T	chr12:25398284-25398284	SNV	1	077-KRAS-75	30.21	37	0	1557	5154	missense_variant	MODERATE	KRAS	3845	NM_004985	NM_004985.3:c.35G>A	c.35G>A	NP_004976.2:p.Gly12Asp	2/5		35	12	G/D	gGt/gAt			deleterious(0)	benign(0.202)	pathogenic	12	25398284	C	T	chr12:25398284-25398284	SNV	1	077-KRAS-75	14.89	37	0	856	5747	missense_variant	MODERATE	KRAS
271	1627392	3	178936091	G	A	chr3:178936091-178936091	SNV	1	027-PIK3CA	18.7	37	0	1030	5507	missense_variant	MODERATE	PIK3CA	5290	NM_006218	NM_006218.2:c.1633G>A	c.1633G>A	NP_006209.2:p.Glu545Lys	10/21		1633	545	E/K	Gag/Aag			deleterious(0.02)	probably_damaging(0.959)	not_provided&pathogenic	3	178936091	G	A	chr3:178936091-178936091	SNV	1	027-PIK3CA	7.93	37	0	386	4865	missense_variant	MODERATE	PIK3CA
272	1628437	17	7578265	A	G	chr17:7578265-7578265	SNV	1	083-TP53-81	83.97	36	0	1163	1385	missense_variant	MODERATE	TP53	7157	NM_000546	NM_000546.5:c.584T>C	c.584T>C	NP_000537.3:p.Ile195Thr	6/11		584	195	I/T	aTc/aCc			deleterious(0)	probably_damaging(1)	pathogenic	17	7578265	A	G	chr17:7578265-7578265	SNV	1	083-TP53-81	54.49	37	0	1317	2417	missense_variant	MODERATE	TP53
273	1629772	12	25398284	C	T	chr12:25398284-25398284	SNV	1	077-KRAS-75	10.11	38	0	733	7249	missense_variant	MODERATE	KRAS	3845	NM_004985	NM_004985.3:c.35G>A	c.35G>A	NP_004976.2:p.Gly12Asp	2/5		35	12	G/D	gGt/gAt			deleterious(0)	benign(0.202)	pathogenic
274	1629772																																	12	25398281	C	T	chr12:25398281-25398281	SNV	1	077-KRAS-75	21.47	37	0	538	2506	missense_variant	MODERATE	KRAS
275	1629772																																	1	115258730	C	T	chr1:115258730-115258730	SNV	1	003-NRAS	21.25	37	0	758	3567	missense_variant	MODERATE	NRAS
276	1629772																																	17	7578457	C	T	chr17:7578457-7578457	SNV	1	084-TP53-82	27.79	37	0	401	1443	missense_variant	MODERATE	TP53
277	1630534	17	7577538	C	T	chr17:7577538-7577538	SNV	1	082-TP53-80	39.56	37	0	434	1097	missense_variant	MODERATE	TP53	7157	NM_000546	NM_000546.5:c.743G>A	c.743G>A	NP_000537.3:p.Arg248Gln	7/11		743	248	R/Q	cGg/cAg			deleterious(0)	probably_damaging(1)	uncertain_significance&likely_pathogenic&pathogenic	17	7577538	C	T	chr17:7577538-7577538	SNV	1	082-TP53-80	36.37	37	0	687	1889	missense_variant	MODERATE	TP53
278	1633361	17	7577094	G	A	chr17:7577094-7577094	SNV	1	081-TP53-79	22.95	38	0	442	1926	missense_variant	MODERATE	TP53	7157	NM_000546	NM_000546.5:c.844C>T	c.844C>T	NP_000537.3:p.Arg282Trp	8/11		844	282	R/W	Cgg/Tgg			deleterious(0)	probably_damaging(0.997)	pathogenic
279	1633361	1	115258747	C	T	chr1:115258747-115258747	SNV	1	003-NRAS	18.6	39	0	1048	5633	missense_variant	MODERATE	NRAS	4893	NM_002524	NM_002524.4:c.35G>A	c.35G>A	NP_002515.1:p.Gly12Asp	2/7		35	12	G/D	gGt/gAt			deleterious(0)	possibly_damaging(0.726)	pathogenic
280	1633361	18	48604688	AGTT	A	chr18:48604689-48604691	Deletion	3	099-SMAD4-97	25.7	38	0	685	2665	inframe_deletion	MODERATE	SMAD4	4089	NM_005359	NM_005359.5:c.1511_1513delGTT	c.1511_1513delGT	NP_005350.1:p.Ser504_Phe505delinsIle	12/12		1511-1513	504-505	SF/I	aGTTtt/att	4T-1_4T
281	1633361																																	17	7577509	C	A	chr17:7577509-7577509	SNV	1	082-TP53-80	65.28	38	0	329	504	stop_gained	HIGH	TP53
282	1633952	12	25398285	C	T	chr12:25398285-25398285	SNV	1	077-KRAS-75	23.71	37	0	890	3754	missense_variant	MODERATE	KRAS	3845	NM_004985	NM_004985.3:c.34G>A	c.34G>A	NP_004976.2:p.Gly12Ser	2/5		34	12	G/S	Ggt/Agt			deleterious(0.03)	possibly_damaging(0.447)	not_provided&pathogenic	12	25398285	C	T	chr12:25398285-25398285	SNV	1	077-KRAS-75	25.69	38	0	1012	3939	missense_variant	MODERATE	KRAS
283	1634419	3	178936082	G	A	chr3:178936082-178936082	SNV	1	027-PIK3CA	14.71	37	0	659	4480	missense_variant	MODERATE	PIK3CA	5290	NM_006218	NM_006218.2:c.1624G>A	c.1624G>A	NP_006209.2:p.Glu542Lys	10/21		1624	542	E/K	Gaa/Aaa	4CT+1		deleterious(0.04)	probably_damaging(0.96)	pathogenic	3	178936082	G	A	chr3:178936082-178936082	SNV	1	027-PIK3CA	14.29	37	0	504	3528	missense_variant	MODERATE	PIK3CA
284	1634419	12	25378562	C	T	chr12:25378562-25378562	SNV	1	075-KRAS-73	15.97	37	-0.01	601	3763	missense_variant	MODERATE	KRAS	3845	NM_004985	NM_004985.3:c.436G>A	c.436G>A	NP_004976.2:p.Ala146Thr	4/5		436	146	A/T	Gca/Aca			deleterious(0.03)	possibly_damaging(0.843)	uncertain_significance	12	25378562	C	T	chr12:25378562-25378562	SNV	1	075-KRAS-73	13.61	37	0	502	3689	missense_variant	MODERATE	KRAS
285	1634419	1	162745476	C	T	chr1:162745476-162745476	SNV	1	009-DDR2	22.18	37	0	955	4306	missense_variant	MODERATE	DDR2	4921	NM_006182	NM_006182.2:c.1891C>T	c.1891C>T	NP_006173.2:p.Arg631Trp	15/18		1891	631	R/W	Cgg/Tgg			deleterious(0)	probably_damaging(1)		1	162745476	C	T	chr1:162745476-162745476	SNV	1	009-DDR2	19.7	37	0	728	3696	missense_variant	MODERATE	DDR2
286	1634419	3	41266137	C	T	chr3:41266137-41266137	SNV	1	022-CTNNB1	30.08	37	-0.01	1241	4126	missense_variant	MODERATE	CTNNB1	1499	NM_001904	NM_001904.3:c.134C>T	c.134C>T	NP_001895.1:p.Ser45Phe	3/15		134	45	S/F	tCt/tTt			deleterious(0)	probably_damaging(0.954)	pathogenic	3	41266137	C	T	chr3:41266137-41266137	SNV	1	022-CTNNB1	26.83	37	-0.01	684	2549	missense_variant	MODERATE	CTNNB1
287	1637058	17	7577580	T	C	chr17:7577580-7577580	SNV	1	082-TP53-80	74.28	37	0	595	801	missense_variant	MODERATE	TP53	7157	NM_000546	NM_000546.5:c.701A>G	c.701A>G	NP_000537.3:p.Tyr234Cys	7/11		701	234	Y/C	tAc/tGc			deleterious(0)	probably_damaging(0.992)	likely_pathogenic&pathogenic	17	7577580	T	C	chr17:7577580-7577580	SNV	1	082-TP53-80	49.47	37	-0.01	419	847	missense_variant	MODERATE	TP53
288	1637058	10	123258070	C	T	chr10:123258070-123258070	SNV	1	071-FGFR2-69	52.3	36	0	1511	2889	missense_variant	MODERATE	FGFR2	2263	NM_000141	NM_000141.4:c.1611G>A	c.1611G>A	NP_000132.3:p.Met537Ile	12/18		1611	537	M/I	atG/atA			deleterious(0)	probably_damaging(0.993)		10	123258070	C	T	chr10:123258070-123258070	SNV	1	071-FGFR2-69	36.87	37	0	827	2243	missense_variant	MODERATE	FGFR2
[truncated: 16 more columns]
